1 **Genomic epidemiology of a complex, multi-species plasmid-borne *bla*<sub>KPC</sub>**  
2 **carbapenemase outbreak in Enterobacterales in the UK, 2009-2014**

3

4 Stoesser N\*<sup>#1, 2</sup>/Phan HTT\*<sup>2,3</sup>, Anna C. Seale<sup>1,4</sup>, Zoie Aiken<sup>5</sup>, Stephanie Thomas<sup>5</sup>,  
5 Matthew Smith<sup>5</sup>, David Wyllie<sup>1</sup>, Ryan George<sup>5</sup>, Robert Sebra<sup>6</sup>, Amy J Mathers<sup>7,8</sup>,  
6 Alison Vaughan<sup>1</sup>, Tim EA Peto<sup>1,2,9</sup>, Matthew J Ellington<sup>10</sup>, Katie L Hopkins<sup>10</sup>,  
7 Derrick W Crook<sup>1,2,9</sup>, Alex Orlek<sup>1,2</sup>, William Welfare<sup>11</sup>, Julie Cawthorne<sup>5</sup>, Cheryl  
8 Lenney<sup>5</sup>, Andrew Dodgson<sup>5, 12</sup>, Neil Woodford<sup>10</sup>, A Sarah Walker<sup>1,2,9</sup>, and the  
9 TRACE Investigators' Group

10 \* These authors contributed equally to this work

11 # Corresponding author

12

13 <sup>1</sup>Nuffield Department of Clinical Medicine, University of Oxford, Oxford, UK

14 <sup>2</sup>NIHR Health Protection Research Unit in Healthcare Associated Infections and  
15 Antimicrobial Resistance, University of Oxford, Oxford, UK

16 <sup>3</sup>Faculty of Medicine, University of Southampton, Southampton, UK

17 <sup>4</sup> Department of Infectious Disease Epidemiology, London School of Hygiene and  
18 Tropical Medicine, UK

19 <sup>5</sup> Manchester University NHS Foundation Trust, Manchester, UK

20 <sup>6</sup> Icahn Institute and Department of Genetics and Genomic Sciences, Icahn School of  
21 Medicine, Mount Sinai, New York, USA

22 <sup>7</sup> Division of Infectious Diseases and International Health, Department of Medicine,  
23 University of Virginia Health System, Charlottesville, Virginia, USA

24 <sup>8</sup> Clinical Microbiology Laboratory, Department of Pathology, University of Virginia  
25 Health System, Charlottesville, Virginia, USA

26 <sup>9</sup> NIHR Biomedical Research Centre, University of Oxford, Oxford, UK

27 <sup>10</sup> Antimicrobial Resistance and Healthcare Associated Infections (AMRHAI)

28 Reference Unit, National Infection Service, Public Health England, London, UK

29 <sup>11</sup> Public Health England North West, Manchester, UK

30 <sup>12</sup> Public Health Laboratory, Public Health England, Manchester, UK

31

32 **Keywords:** carbapenemase, Enterobacterales, KPC, whole genome sequencing, short-  
33 read sequencing, long-read sequencing, outbreak analysis

34

35 **Corresponding author:** Nicole Stoesser

36 Email: [nicole.stoesser@ndm.ox.ac.uk](mailto:nicole.stoesser@ndm.ox.ac.uk)

37 Tel: +44 (0) 1865 220856

38 **ABSTRACT**

39 Carbapenem resistance in Enterobacterales is a public health threat. *Klebsiella*  
40 *pneumoniae* carbapenemase (encoded by alleles of the *bla*<sub>KPC</sub> family) is one of the  
41 commonest transmissible carbapenem resistance mechanisms worldwide. The  
42 dissemination of *bla*<sub>KPC</sub> has historically been associated with distinct *K. pneumoniae*  
43 lineages (clonal group 258 [CG258]), a particular plasmid family (pKpQIL), and a  
44 composite transposon (Tn4401). In the UK, *bla*<sub>KPC</sub> has caused a large-scale, persistent  
45 outbreak focused on hospitals in North-West England. This outbreak has evolved to  
46 be polyclonal and poly-species, but the genetic mechanisms underpinning this  
47 evolution have not been elucidated in detail; this study used short-read whole genome  
48 sequencing of 604 *bla*<sub>KPC</sub>-positive isolates (Illumina) and long-read assembly  
49 (PacBio)/polishing (Illumina) of 21 isolates for characterisation. We observed the  
50 dissemination of *bla*<sub>KPC</sub> (predominantly *bla*<sub>KPC-2</sub>; 573/604 [95%] isolates) across eight  
51 species and more than 100 known sequence types. Although there was some variation  
52 at the transposon level (mostly Tn4401a, 584/604 (97%) isolates; predominantly with  
53 ATTGA-ATTGA target site duplications, 465/604 [77%] isolates), *bla*<sub>KPC</sub> spread  
54 appears to have been supported by highly fluid, modular exchange of larger genetic  
55 segments amongst plasmid populations dominated by IncFIB (580/604 isolates),  
56 IncFII (545/604 isolates) and IncR replicons (252/604 isolates). The subset of  
57 reconstructed plasmid sequences also highlighted modular exchange amongst non-  
58 *bla*<sub>KPC</sub> and *bla*<sub>KPC</sub> plasmids, and the common presence of multiple replicons within  
59 *bla*<sub>KPC</sub> plasmid structures (>60%). The substantial genomic plasticity observed has  
60 important implications for our understanding of the epidemiology of transmissible  
61 carbapenem resistance in Enterobacterales, for the implementation of adequate  
62 surveillance approaches, and for control.

63 **IMPORTANCE**

64 Antimicrobial resistance is a major threat to the management of infections, and  
65 resistance to carbapenems, one of the “last line” antibiotics available for managing  
66 drug-resistant infections, is a significant problem. This study used large-scale whole  
67 genome sequencing over a five-year period in the UK to highlight the complexity of  
68 genetic structures facilitating the spread of an important carbapenem resistance gene  
69 (*bla<sub>KPC</sub>*) amongst a number of bacterial species that cause disease in humans. In  
70 contrast to a recent pan-European study from 2012-2013(1), which demonstrated the  
71 major role of spread of clonal *bla<sub>KPC</sub>-Klebsiella pneumoniae* lineages in continental  
72 Europe, our study highlights the substantial plasticity in genetic mechanisms  
73 underpinning the dissemination of *bla<sub>KPC</sub>*. This genetic flux has important  
74 implications for: the surveillance of drug resistance (i.e. making surveillance more  
75 difficult); detection of outbreaks and tracking hospital transmission; generalizability  
76 of surveillance findings over time and for different regions; and for the  
77 implementation and evaluation of control interventions.

78 **INTRODUCTION**

79 Antimicrobial resistance (AMR) in Enterobacterales is a critical public health threat.  
80 Carbapenem resistance is of particular concern, and outbreaks involving multiple  
81 species of carbapenemase-producing Enterobacterales (CPE) are increasingly  
82 reported(2-5). Exchange of AMR genes, including carbapenem resistance genes,  
83 happens at multiple genetic levels(6), and is often facilitated by their presence on  
84 plasmids [circular DNA structures of variable size (2kb~>1Mb)], and/or other smaller  
85 mobile genetic elements (MGEs) such as transposons and insertion sequences (IS),  
86 that form part of the accessory genome.

87

88 Whole genome sequencing (WGS) has significantly improved our understanding of  
89 infectious diseases epidemiology and is used in both community-associated and  
90 nosocomial transmission analyses(7, 8). Although useful for delineating transmission  
91 routes in clonal, strain-based outbreaks, standard phylogenetic approaches and  
92 comparative analyses have been more difficult for outbreaks involving multiple  
93 bacterial strains/species and transmissible resistance genes(6). Reconstruction of the  
94 genetic structures of plasmids carrying relevant antimicrobial resistance genes using  
95 long-read sequencing has improved our understanding of the genetic complexity of  
96 these resistance gene outbreaks, but has been difficult to undertake on a large scale.

97

98 Although approximately 40 *Klebsiella pneumoniae* carbapenemase (KPC; encoded by  
99 *bla<sub>KPC</sub>*) variants have now been described (as per NCBI's AMR reference gene  
100 catalogue, available at <https://www.ncbi.nlm.nih.gov/pathogens/isolates#/refgene/>),  
101 only two have been most widely reported globally, namely KPC-2 and KPC-3  
102 (H272Y with respect to KPC-2; single nucleotide difference in *bla<sub>KPC</sub>* [C814T])(9),

103 10). In the UK, the first KPC isolate identified was a KPC-4-containing *Enterobacter*  
104 sp. isolated in Scotland in 2003(11), with subsequent identification of KPC-3 in  
105 isolates in the UK in 2007. From 2007, increasing numbers of suspected KPC isolates  
106 were referred to Public Health England (PHE's) Antimicrobial Resistance and  
107 Healthcare Associated Infections (AMRHAI) Reference Unit, with the majority of  
108 confirmed KPC-producers (>95%) coming from an evolving KPC-2-associated  
109 outbreak in hospitals in North-West England, first recognised in 2008(12). These  
110 isolates were predominantly *bla*<sub>KPC</sub>-positive Enterobacterales cultured from patients  
111 in the Central Manchester University Hospitals NHS Foundation Trust (CMFT; now  
112 part of Manchester University NHS Foundation Trust)(13). *bla*<sub>KPC</sub> is thought to have  
113 been introduced into the region via a pKpQIL-like plasmid(14, 15), a plasmid  
114 backbone previously associated with the global dissemination of *bla*<sub>KPC</sub> in *K.*  
115 *pneumoniae* clonal group 258, and already observed in other *K. pneumoniae* sequence  
116 types (STs) and species in an analysis of 44 UK KPC-Enterobacterales from 2008-  
117 2010(15).

118

119 We used WGS to undertake a large-scale retrospective study of this multi-species,  
120 polyclonal, *bla*<sub>KPC</sub> outbreak in North-West England from 2009, generating complete  
121 genome structures, including *bla*<sub>KPC</sub> plasmids, for a subset of isolates. We  
122 contextualised our analysis of regional outbreak strains using isolates from a national  
123 *bla*<sub>KPC</sub> surveillance programme, with the goal of understanding the genetic structures  
124 associated with the regional emergence of *bla*<sub>KPC</sub> in this setting.

125

126 **RESULTS**

127 Of 742 isolates identified for sequencing, 60 (8%) were not retrievable or cultivable  
128 from the laboratory archives. After de-duplicating by taking the first *bla*<sub>KPC</sub>-positive  
129 Enterobacterales (KPC-E) per patient, and excluding sequencing failures, any  
130 sequences without *bla*<sub>KPC</sub> (assumed lost in culture), and mixtures (identified from  
131 genomic data analysis, see Methods), 604 evaluable isolate sequences were included.  
132 These included: 327 archived isolates (54%) from inpatients in the early stages of the  
133 observed outbreak (2009-2011), of which 309 and 18 isolates were from CMFT and  
134 the University Hospital of South Manchester NHS Foundation Trust (UHSM; now  
135 part of Manchester University NHS Foundation Trust) respectively; 78 (13%) later  
136 isolates from CMFT/UHSM (2012-2014); 119 (20%) isolates from other hospitals  
137 (n=15 hospitals) in North-West England (2009-2014, excluding CMFT and UHSM,  
138 up to the first 25 consecutive KPC-E isolates per hospital); 72 (12%) isolates from  
139 UK and Republic of Ireland hospitals (n=72 locations [n=4 from the Republic of  
140 Ireland]) outside the North-West (2009-2014) (first KPC-E isolate per hospital); and 8  
141 (1%) isolates from English outpatient/primary care settings.

142  
143 Although three *bla*<sub>KPC</sub> variants were observed in the 604 included isolates, *bla*<sub>KPC-2</sub>  
144 dominated (n=573, 95%); *bla*<sub>KPC-3</sub> [n=27, 4%] and *bla*<sub>KPC-4</sub> [n=4, 1%] were also  
145 observed. Two isolates (0.3%; trace524, trace534) showed evidence of mixed  
146 populations of *bla*<sub>KPC-2</sub> and *bla*<sub>KPC-3</sub>. The median *bla*<sub>KPC</sub> copy number estimate was 1.8  
147 (IQR: 1.6-2.1), with a maximum of 8.2. Across the three main species, *bla*<sub>KPC</sub> copy  
148 numbers were higher in *K. pneumoniae* (n=525 [87%], median 1.8 [IQR: 1.6-2.1]),  
149 than *E. coli* (40 [7%]: 1.7 [1.5-1.9]) or *E. cloacae* (26 [4%], 1.6 [1.4-2.0]) (Kruskal-  
150 Wallis; p=0.0003; Fig.1A). Amongst common STs, copy number was highest in *K.*

151 *pneumoniae* ST258 (n=65 [11%], median 2.4 [IQR: 1.8-2.9]) versus other species/STs  
152 (n=531 [89%], median 1.8 [1.6, 2.0]) (Kruskal-Wallis; p=0.0001; Fig.1B, Fig.S1).

153

154 Other broad or extended-spectrum beta-lactamase genes were also commonly present  
155 across isolates, including: *bla*<sub>TEM</sub> (n=452, all *bla*<sub>TEM-1</sub>), *bla*<sub>OXA</sub> (n=492;  $\Delta$ *bla*<sub>OXA-9</sub>  
156 [n=425], *bla*<sub>OXA-1</sub> [n=138]), *bla*<sub>SHV</sub> (n=497) and *bla*<sub>CTX-M</sub> (n=89; *bla*<sub>CTX-M-15</sub> [n=57],  
157 *bla*<sub>CTX-M-9</sub> [n=28]). Aminoglycoside resistance genes were also widely prevalent: *aac*  
158 (n=243), *aph* (n=196), *ant* (n=93) and *aadA* (n=280). In terms of acquired quinolone  
159 resistance, 160 isolates contained *qnr* variants, and 137 isolates contained *aac(6')-Ib-*  
160 *cr*; no *qep* variants were seen.

161

162 Insertion sequences (ISs) have been shown to be key in the reshaping and  
163 streamlining of bacterial genomes, as well as exerting more subtle effects in the  
164 regulation of gene expression(16). The median number of different IS types in isolates  
165 was 15 (IQR: 13-16), with a maximum of 32. Four hundred distinct IS profiles were  
166 identified amongst the 604 isolates, with only five identical profiles shared amongst  
167  $\geq 10$  isolates - these included a distinct profile seen only in national *K. pneumoniae*  
168 ST258 isolates (*IS1F*, *IS1R*, *IS3000*, *IS6100*, *IS903B*, *ISEcl1*, *ISKpn1*, *ISKpn14*,  
169 *ISKpn18*, *ISKpn25*, *ISKpn26*, *ISKpn28*, *ISKpn31*, *ISKpn6*, *ISKpn7*), and other unique  
170 profiles seen in small groups of *K. pneumoniae* ST588, ST11, ST321 and ST54. This  
171 highlights the significant flux of small mobile genetic elements within and between  
172 lineages in our dataset.

173

174 *Tn4401* is a ~10kb transposon that has been the major transposable context for *bla*<sub>KPC</sub>  
175 to date(17, 18). A predominant *Tn4401* isoform was associated with both *bla*<sub>KPC-2</sub> and



176 *bla*<sub>KPC-3</sub> in this study, namely Tn4401a(17), which occurred in 584/604 (97%)  
177 isolates. Other known variants included Tn4401b (n=7) and Tn4401d (n=3). Only  
178 20/584 (3%) isolates demonstrated evidence of SNV-level variation in Tn4401a  
179 (homozygous calls at 6 positions; heterozygous calls [i.e. mixed populations] at 3  
180 positions). *bla*<sub>KPC-2</sub>-Tn4401a (n=539 isolates) was predominantly flanked by a 5-bp  
181 target site duplication (TSD) ATTGA, with 465/604 (77%; 465/539 [86%] of this  
182 sub-type) isolates with this Tn4401/TSD combination (Fig.2A). In 74 other *bla*<sub>KPC-2</sub>-  
183 Tn4401a isolates, the Tn4401a was flanked by other target site sequence (TSS)  
184 combinations, consistent with additional transposition events. Thirty-two of these  
185 were TSDs (16 AATAT-AATAT, 16 AGTTG-AGTTG), which have been described  
186 as more consistent with inter-plasmid transposition of Tn4401(19), and 35 were non-  
187 duplicate TSS combinations (ATTGA with either ATATA, TGGTA, CTGCC,  
188 AATAA, AGGAT), described as more consistent with intra-plasmid transposition.  
189 Evidence of multiple TSSs around *bla*<sub>KPC-2</sub>-Tn4401a within single isolates was seen  
190 in 6 cases (i.e. multiple right and/or left Tn4401 TSSs); 1 case had a right TSS  
191 present, but no left TSS identified.  
192  
193 The 604 isolates contained 91 unique combinations of plasmid Inc types (a crude  
194 proxy of plasmid populations present); no isolate was replicon negative. However,  
195 there were seven predominant combinations (Fig.2B) represented in 443/604 (73%)  
196 isolates, and these included six major Inc types, namely IncF (FIB [found in n=580  
197 isolates], FII [n=545]), FIA (n=103), IncR (n=252), ColRNAI (n=86), and IncX3  
198 (n=60). For many of the plasmid families, several different reference replicon  
199 sequences exist in the PlasmidFinder database, with a degree of homology amongst  
200 sequences in the same family, making it difficult to establish exactly which exact sub-

201 type of replicon is present. However, restricting to 100% matches to reference  
202 replicon types for these common families, top matches included:  
203 IncFIB(pQil)\_JN233705 (n=300) and IncFIB(K)\_1\_Kpn3\_JN233704 (n=107);  
204 ColRNAI\_1\_DQ298019 (n=84); IncR\_1\_DQ449578 (n=70); and  
205 IncFII\_1\_pKP91\_CP000966 (n=62; plasmid MLST IncFII<sub>K4</sub>),  
206 IncFII(K)\_1\_CP000648 (n=51; plasmid MLST IncFII<sub>K1</sub>) and IncFII\_1\_AY458016  
207 (n=19; plasmid MLST IncFII<sub>K2</sub>).

208

209 Species and lineage diversity in the outbreak was substantial, with eight different  
210 species amongst sequenced isolates, and many different known STs, including: *K.*  
211 *pneumoniae* (n=525 isolates, 70 known STs), *E. coli* (n=40, 20 known STs),  
212 *Enterobacter cloacae* (n=26, 9 known STs), *Klebsiella oxytoca* (n=6, 3 known STs),  
213 *Raoultella ornithinolytica* (n=4), *Enterobacter aerogenes* (n=2), *Serratia marcescens*  
214 (n=1) and *Kluyvera ascorbata* (n=1). The most common STs were all *K. pneumoniae*,  
215 including ST258 (n=66), ST11 (n=35), ST491 (n=31), ST1162 (n=29) and ST54  
216 (n=27) (Fig.2C). Therefore, although some of the earliest sequenced isolates were  
217 KPC-*K. pneumoniae* ST258 and ST11 (both in 2009) [two major KPC strains from  
218 CG258 circulating globally and in China at the time(9, 20)] and although KPC-  
219 producing *K. pneumoniae* ST258 appears to have been one of the earliest strains  
220 observed in CMFT and UHSM, multiple diverse STs and species were subsequently  
221 rapidly recruited to the outbreak in 2010 and 2011. This was most likely by the  
222 widespread sharing of a *bla*<sub>KPC-2</sub>-Tn4401a-ATTGA-ATTGA transposon within and  
223 between IncFIB, IncFII and IncR plasmid populations (Fig.2B, 2C).

224

225 *Long-read sequencing analyses*

226 In addition to short-read data, to resolve genetic structures fully we obtained long-  
227 read PacBio data for 23 isolates, chosen to maximise the *bla*<sub>KPC</sub> plasmid diversity  
228 assayed and focussing on isolates collected from the two main Manchester hospitals  
229 (12 CMFT isolates, 5 UHSM; plus 2 from other hospitals in North-West England, 4  
230 from other UK locations). These included the two presumed earliest *bla*<sub>KPC</sub> isolates  
231 from both CMFT and UHSM, as well as isolates sharing the same species/ST but with  
232 different plasmid replicon combinations or from North West regional versus national  
233 locations, same-species isolates with different STs, and isolates of different species.  
234 One PacBio sequencing dataset represented a clear isolate mixture (trace597 [UHSM]  
235 of *E. cloacae* ST133 and *K. pneumoniae* ST258), and for one isolate (trace457  
236 [CMFT]), there were discrepancies between the short-read and long-read sequencing  
237 datasets, suggesting a laboratory error (*E. cloacae* ST45 long-read, *E. coli* ST88  
238 short-read). These two assemblies were excluded, leaving 21 assemblies for further  
239 analysis (Table S1).

240

241 Of the 153 contigs from these 21 assemblies, 30 were clearly chromosomal, 77  
242 plasmid, one chromosomal with an integrated plasmid, and 45 with unclear  
243 provenance (i.e. possibly phage, plasmid, or chromosomal). Overall 78/153 [51%]  
244 contigs were circularised, including 56/77 [73%] clear plasmid sequences. Thirty-one  
245 contigs (21 (68%) circularised) harboured *bla*<sub>KPC</sub>, of which one (trace552, *K.*  
246 *pneumoniae* ST11) had *bla*<sub>KPC</sub> integrated into the chromosome. Four isolates had  
247 multiple copies of *bla*<sub>KPC</sub> (trace205 [*K. pneumoniae*, ST468; 2 copies, 1 contig],  
248 trace457 [*E. cloacae*, ST45; 5 copies [1 truncated], 2 contigs], trace75 [*K.*  
249 *pneumoniae*, ST252; 2 copies, 2 contigs], trace149 [9 copies, 9 contigs]). Trace149  
250 (*E. coli*, ST1642), which had nine copies of *bla*<sub>KPC</sub>, had one copy each on: a long,

251 incomplete *bla*<sub>KPC</sub> contig (203kb), seven nearly identical complete *bla*<sub>KPC</sub>-containing  
252 circularised sequences of size ~10kb (possibly representing circularised translocatable  
253 intermediates(21)), and a short linear *bla*<sub>KPC</sub> contig (~18kb).

254

255 We observed *bla*<sub>KPC</sub> in multiple plasmid backgrounds (Fig.3), including a majority of  
256 *bla*<sub>KPC</sub> plasmids with multiple replicons (13/21 [60%] clear plasmid contigs, as  
257 represented in Fig.3), particularly with IncFIB/IncFII and/or IncR, consistent with  
258 replicon patterns in the isolates overall (Fig.2). For the IncFII group, for which we  
259 had 17 plasmid sequences with an IncFII(K)\_CP000648-like replicon (plasmidFinder  
260 match; 5 *bla*<sub>KPC</sub>-negative [i.e. not represented in Fig.3] and 12 *bla*<sub>KPC</sub>-positive), there  
261 was evidence of significant exchange and rearrangement of plasmid components  
262 between both *bla*<sub>KPC</sub>-positive and *bla*<sub>KPC</sub>-negative plasmids, integration of IncFII<sub>K</sub> and  
263 IncR plasmids, and gene duplication events of Tn4401/*bla*<sub>KPC</sub>, as well as sharing  
264 between STs and species (Fig.4).

265

266 In addition to their plasticity, part of the success of these *bla*<sub>KPC</sub> plasmids may also be  
267 attributable to the presence of toxin-antitoxin plasmid addiction systems (*ccdA/ccdB*  
268 n=4 *bla*<sub>KPC</sub> plasmids; *higA* n=6; *vapB/vapC* n=11); anti-restriction mechanisms (*klcA*  
269 n=16, previously shown to promote *bla*<sub>KPC</sub> dissemination(22)); and heavy metal  
270 resistance (*terB* [tellurite] n=3; *ars* operon [arsenicals] n=3; chromate resistance n=1;  
271 *cop* operon/*pcoC/pcoE* [copper] n=7; *mer* operon [mercury] n=10).

272

273 *bla*<sub>KPC</sub> plasmid typing

274 Attempts to identify complete plasmids (as opposed to plasmid replicon typing) from  
275 short-read data by comparison to a reference plasmid database has been estimated as

276 being correct in only ~45%-85% of cases in previous studies(6, 23). However, 13/14  
277 (93%) of isolates for which we had hybrid assemblies with only one completely  
278 reconstructed *bla*<sub>KPC</sub> plasmid had the correct top match using our *bla*<sub>KPC</sub> plasmid  
279 typing method (Table S2). Noting that any complete plasmid typing approach from  
280 short-read data is sub-optimal, we compared all short-read sequences with our  
281 reference *bla*<sub>KPC</sub> plasmid database (see Methods); matches to one or more reference  
282 *bla*<sub>KPC</sub> plasmid sequences were identified in 554/604 (92%) isolates. Filtering the  
283 single match with the highest score at the predefined  $\geq 0.80$  threshold left a subset of  
284 428/554 (77%) for evaluation. These 428 isolates had matches to 12 *bla*<sub>KPC</sub> plasmid  
285 clusters.

286

287 Based on classification by these top plasmid-cluster matches, *bla*<sub>KPC</sub> plasmid clusters  
288 were shared across a median (IQR) of 3 (1-6) STs, with pKpQIL-like plasmids being  
289 most widespread across species/STs (7 species, 75 STs), and clearly playing a major  
290 role in the North-West England outbreak, as well as being spread regionally and  
291 nationally (Fig.5). Other plasmid types identified as top-matches across the entire  
292 dataset included those fully resolved by long-read sequencing performed within this  
293 study, some of which were seen in  $\geq 5\%$  of study isolates (e.g. pKPC-trace75 [a non-  
294 typeable replicon]), and in non-North-West settings, likely reflecting recombination  
295 and generation of new *bla*<sub>KPC</sub> plasmid variants in North-West England and their  
296 subsequent dissemination.

297

## 298 **DISCUSSION**

299 We present the largest WGS-based analysis of *bla*<sub>KPC</sub>-positive isolates (n=604) to our  
300 knowledge, focused on assessing genetic diversity around the carbapenemase gene

301 itself rather than limiting the analysis based on species type, and incorporating a  
302 sampling frame from UK regional and national collections, over five years. *bla*<sub>KPC</sub>  
303 remains one of the three most common carbapenemases observed in the UK,  
304 accounting for ~15% of cases referred to the AMRHAI Reference Unit in 2017(24),  
305 and presenting a significant challenge to hospitals in North-West England, including  
306 Manchester, where it accounted for >97% of carbapenem resistance through  
307 2015(25).

308

309 Our study provides an interesting context in which to consider the findings of a  
310 recently published pan-European survey of carbapenem non-susceptible *K.*  
311 *pneumoniae* (the EuSCAPE study; 6 months, 2013-2014; 244 hospitals, 32  
312 countries)(1). In EuSCAPE, 684 carbapenemase-producing *Klebsiella* spp. isolates  
313 were Illumina sequenced, and similar to our study, most cases were healthcare-  
314 exposed (<2% from outpatients). EuSCAPE carbapenemase-producing isolates were  
315 also predominantly *bla*<sub>KPC</sub> (~45%, n=311 isolates), but mostly *bla*<sub>KPC-3</sub> (232/311  
316 [75%] versus 27/604 [5%] in our study), and ST258/ST512 (226/311 [73%] versus  
317 107/525 (20%) of *K. pneumoniae* overall in our study). Based on identifying genetic  
318 “nearest-neighbours” in their data, the EuSCAPE team found 51% of *bla*<sub>KPC-K</sub>.  
319 *pneumoniae* were most closely related to another isolate from the same hospital. The  
320 authors concluded that there was strong geographic structuring of strains, and that the  
321 expansion of a handful of clonal lineages was predominantly responsible for the  
322 spread of carbapenemases in *K. pneumoniae* in Europe, with onward nosocomial  
323 transmission. Like *bla*<sub>KPC-3</sub> in EuSCAPE, *bla*<sub>KPC-2</sub> has also been linked with the clonal  
324 expansion of ST258 in Australia(26), where 48% of 176 *K. pneumoniae* isolates  
325 sequenced were *bla*<sub>KPC-2</sub>-containing ST258.

326

327 However, instead of clonal expansion, in our study we found rapid dissemination of  
328 mobile backgrounds supporting *bla*<sub>KPC-2</sub>, similar to observations from sequencing of  
329 other polyclonal *bla*<sub>KPC</sub> outbreaks reported elsewhere, including the US(6, 27).  
330 Tn4401a, associated with high levels of *bla*<sub>KPC</sub> expression(28), has been previously  
331 predominantly seen in *K. pneumoniae*, and in isolates from the US, Israel and Italy,  
332 and similarly most commonly with an ATTGA-ATTGA TSD(10). Thus our findings  
333 are consistent with the importation of the predominant *bla*<sub>KPC-2</sub>-Tn4401a-ATTGA-  
334 ATTGA motif into CMFT/North-West England and subsequent horizontal spread.  
335 Notably, as in EuSCAPE, 46/72 (64%) singleton isolates we sampled from UK  
336 hospitals were also CG258, but our detailed sampling within a region reflected a very  
337 different molecular epidemiology. Although the EuSCAPE study is large and  
338 impressive, its breadth may have been limiting in understanding regional diversity -  
339 for example, the subset of *bla*<sub>KPC</sub>-*K. pneumoniae* from the UK that were analysed in  
340 EuSCAPE consisted of 11 isolates submitted from six centres  
341 ([https://microreact.org/project/EuSCAPE\\_UK](https://microreact.org/project/EuSCAPE_UK)). The focus was also more on analysing  
342 species-specific clonal relationships, with no analysis of other species or MGEs.

343

344 Although in our study diversification occurred at all genetic levels (Tn4401+TSSs,  
345 plasmids, plasmid populations, strains, species), there was more limited variation  
346 observed within the transposon and its flanking regions, and the spread of *bla*<sub>KPC</sub>  
347 appears to have been supported by highly plastic modular exchange of larger genetic  
348 segments within a distinct plasmid population, particularly IncFIB/IncFII (found in  
349 580 and 545 of the 604 isolates respectively) and IncR replicons (252/604 isolates). A  
350 previous study, in which 11 transformed *bla*<sub>KPC</sub> plasmids from the UK (2008-2010)

351 were sequenced (Roche 454/assembly, PCR+sequencing based gap closure),  
352 identified a UK variant of the pKpQIL plasmid, designated pKpQIL-UK (IncFII<sub>K2</sub> by  
353 plasmid MLST), that was highly similar to pKpQIL (maximum 32 SNVs diversity),  
354 and several other IncFII<sub>K2</sub> pKpQIL-like plasmids, but with novel segmental genetic  
355 rearrangements (gains/losses; pKpQIL-D1, pKpQIL-D2)(15). Our data support the  
356 importance of IncFII<sub>K2</sub>-like plasmids in this *bla*<sub>KPC</sub> outbreak too, but also that other  
357 IncFII<sub>K</sub>-like plasmids (e.g. IncFII<sub>-K1, -K4, -K7, -K15</sub>) and replicons (IncFIB, IncR) have  
358 also been a significant feature. In addition to their plasticity, the plasmids identified  
359 frequently harboured AMR genes other than *bla*<sub>KPC</sub> which might offer a selective  
360 advantage, alongside heavy metal resistance genes, and plasmid toxin-antitoxin  
361 addiction systems. The plasticity and association of IncFII<sub>K</sub> plasmids with resistance  
362 genes and IncFIB replicons has been supported by findings of a recent analysis of  
363 IncFII<sub>K</sub> plasmids(29).

364

365 The problem of accurately classifying plasmid populations from short-read data was  
366 exemplified in this analysis, and highlighted by our smaller long-read/short-read  
367 hybrid assembly-based analysis, which demonstrated significant diversity within  
368 structures assigned as similar by short-read based typing approaches. With this caveat,  
369 it was interesting that even with relatively relaxed thresholds, 29% of isolates did not  
370 have a match to our reference *bla*<sub>KPC</sub> plasmid database (based on clustering of all  
371 publicly available reference sequences, as in Methods), consistent with rapid  
372 diversification in the genetic background of Tn4401/*bla*<sub>KPC</sub> elements in this setting.

373

374 Our findings demonstrated that it is also important to consider plasmids without the  
375 resistance gene of interest in a population, as these may be relevant to a wider



376 understanding of the transmission and evolution of smaller mobile genetic elements  
377 harbouring resistance genes (Fig.4). This was also shown to be relevant in a previous  
378 analysis of a large KPC-*E. coli* outbreak in the same setting in 2015-2016, in which a  
379 circulating *bla*<sub>KPC</sub>-negative plasmid, pCAD3 (IncFIB/FII), acquired Tn4401 from a  
380 IncHI2/HI2A *bla*<sub>KPC</sub>-positive plasmid, and went on to dominate within a clonal *E. coli*  
381 lineage(25). Most studies in general however tend to focus on analysing AMR  
382 plasmids of interest. Fortunately, long-read sequencing is becoming increasingly low  
383 cost and high-throughput, and hybrid assembly is able to reconstruct plasmid  
384 sequences in Enterobacterales(30, 31). New developments in large-scale comparative  
385 genomics of complete genomes, including plasmid structures, are essential for future  
386 large-scale analysis of AMR gene outbreaks.

387

388 There are several limitations to our study. The reconstructed genomes generated using  
389 long-read PacBio data remained incomplete (49% of all contigs uncircularised).  
390 Improvements in long-read technology and assembly approaches will likely overcome  
391 this(30). Our short-read and long-read datasets were generated from the same frozen  
392 stocks of isolates, but from separate sub-cultures (because we used the short-read data  
393 to inform selection for long-read sequencing); ideally they would have been generated  
394 from the same DNA extract. PacBio sequencing library preparation incorporates size  
395 selection, and this may have led to short plasmid sequences (<15kb) being lost. Our  
396 interpretation of the evolution of backgrounds supporting *bla*<sub>KPC</sub> was limited by the  
397 diversity present, and the inability to capture sequential evolutionary events, even  
398 with this large study. Lastly, very limited epidemiological data linked to the isolates  
399 were available, meaning that we were unable to ascertain any epidemiological drivers  
400 which might be contributing to the enormous heterogeneity of *bla*<sub>KPC</sub> transmission

401 over apparently short timeframes; the latter finding also precluded the useful  
402 application of standard phylogenetic approaches based on identifying variants core to  
403 and within species. In addition, the collection of isolates by PHE as part of regional  
404 and national surveillance was dictated by referral patterns of isolates from the  
405 hospitals surveyed, and we do not have any denominator information on cultures  
406 (either *bla*<sub>KPC</sub>-positive or *bla*<sub>KPC</sub>-negative) to corroborate details on the robustness of  
407 this referral process.

408

409 In conclusion, our large analysis highlights the difficulty and complexity of these  
410 outbreaks once important AMR genes have “escaped” the genetic confines of  
411 particular mobile genetic elements and bacterial species/lineages, with important  
412 implications for surveillance. These include the need to consider multiple bacterial  
413 species and plasmids as potential hosts of *bla*<sub>KPC</sub>, and invest resource in sequencing  
414 approaches to adequately reconstruct genetic structures and avoid misinterpreting the  
415 molecular epidemiology. It also demonstrates that regional differences in AMR gene  
416 epidemiology may be quite marked, which may affect the generalizability of control  
417 methods. Finally, it is important to consider the wider genetic background of host  
418 strains and plasmids in understanding the evolution and dissemination of important  
419 AMR genes, as AMR gene transfer between plasmid backgrounds within bacteria  
420 may occur over short timescales, and the interaction of several plasmids (i.e. not just  
421 those harbouring the AMR gene of interest at any given time) in a population may be  
422 highly relevant to the persistence and dissemination of the AMR gene itself.

423

## 424 **MATERIAL AND METHODS**

425 *Study isolates and setting*

426 We sequenced archived carbapenem-resistant Enterobacterales isolates from two  
427 hospital groups in Manchester (formerly known as CMFT and UHSM), aiming to  
428 include all inpatient isolates archived in the early stages of the observed outbreak,  
429 2009-2011, and a subset of *bla*<sub>KPC</sub>-positive Enterobacterales (KPC-E) isolates  
430 sequenced as part of regional and national surveillance undertaken by Public Health  
431 England (PHE, 2009-2014). The PHE set included: (i) up to the first 25 consecutive  
432 KPC-E isolates from any hospital in North-West England (2009-2014) and referred to  
433 the PHE reference laboratory (2009-2014); (ii) the first KPC-E isolate from any other  
434 hospital in the UK and the Republic of Ireland referred to PHE (2009-2014); and, (iii)  
435 any KPC-E isolates from outpatient/primary care settings in the UK referred to PHE  
436 (2009-2014).

437

438 Ethical approval was not required as only bacterial isolates were sequenced, and their  
439 collection was part of outbreak investigation and management.

440

#### 441 *DNA extraction and sequencing*

442 For short-read Illumina sequencing (HiSeq 2500, 150bp PE reads), DNA was  
443 extracted using Quickgene (Fujifilm, Japan), with an additional mechanical lysis step  
444 following chemical lysis (FastPrep, MP Biomedicals, USA). Sequencing libraries  
445 were constructed using the NEBNext Ultra DNA Sample Prep Master Mix Kit (NEB)  
446 with minor modifications and a custom automated protocol on a Biomek FX  
447 (Beckman). Ligation of adapters was performed using Illumina Multiplex Adapters,  
448 and ligated libraries were size-selected using Ampure magnetic beads (Agencourt).  
449 Each library was PCR-enriched with custom primers (Index primer plus dual index  
450 PCR primer) (32). Enrichment and adapter extension of each preparation was

451 obtained using 9ul of size-selected library in a 50ul PCR reaction. Reactions were  
452 then purified with Ampure beads (Agencourt/Beckman) on a Biomek NXp after 10  
453 cycles of amplification (as per Illumina recommendations). Final size distributions of  
454 libraries were determined using a Tapestation 1DK system (Agilent/Lab901), and  
455 quantified by Qubit fluorometry (Thermofisher).

456

457 For long-read sequencing (PacBio [n=28]), DNA was extracted using the Qiagen  
458 Genomic tip 100/G kit (Qiagen, Netherlands). DNA extracts were initially sheared to  
459 an average length of 15kb using g-tubes, as specified by the manufacturer (Covaris).  
460 Sheared DNA was used in SMRTbell library preparation, as recommended by the  
461 manufacturer. Quantity and quality of the SMRTbell libraries were evaluated using  
462 the High Sensitivity dsDNA kit and Qubit Fluorimeter (Thermo Fisher Scientific) and  
463 DNA 12000 kit on the 2100 Bioanalyzer (Agilent). To obtain the longest possible  
464 SMRTbell libraries for sequencing (as recommended by the manufacturer), a further  
465 size selection step was performed using the PippinHT pulsed-field gel electrophoresis  
466 system (Sage Science), enriching for the SMRTbell libraries >15kb for loading onto  
467 the instrument. Sequencing primer and P6 polymerase were annealed and bound to  
468 the SMRTbell libraries, and each library was sequenced using a single SMRT cell on  
469 the PacBio RSII sequencing system.

470

471 Sequencing data have been deposited in the NCBI (BioProject Accession:  
472 PRJNA564424).

473

474 *Sequence data processing and assembly*

475 We used Kraken(33) to assign species to sequenced isolates. SPAdes(34) v3.6 was  
476 used to *de novo* assemble reads (default options; subsequent removal of contigs  
477 shorter than 500bp and assembly coverage <2X). Isolates with sequence assemblies  
478 >6.5Mb were excluded to ensure that potentially mixed sequences were not included  
479 in the analyses. MLST was derived in silico by blasting *de novo* assemblies against  
480 publicly available MLST databases for *E. coli*  
481 (<http://mlst.warwick.ac.uk/mlst/dbs/Ecoli>), *K. pneumoniae*, *E. cloacae* and *K. oxytoca*  
482 (<https://pubmlst.org/>). Isolates with mixed MLST outputs were excluded.  
483 Antimicrobial resistance (AMR) genes, plasmid replicon (Inc) types and insertion  
484 sequences (IS) were identified using resistType  
485 ([https://github.com/hangphan/resistType\\_docker](https://github.com/hangphan/resistType_docker); curated AMR gene database as  
486 in(35), plasmid replicon reference sequences from PlasmidFinder(36), ISs from the  
487 ISFinder platform(37);  $\geq 80\%$  identity used as a threshold). *bla*<sub>KPC</sub> copy number for  
488 each isolate was estimated by dividing coverage of the contig containing *bla*<sub>KPC</sub> by  
489 the average coverage for the assembly. Plasmid MLST for common family types  
490 identified in short read data and for resolved genomes (i.e. based on PacBio and Pilon  
491 assemblies - see below) was confirmed by 100% sequence matches to reference  
492 alleles for families catalogued in the plasmidMLST website  
493 (<https://pubmlst.org/plasmid/>; IncA/C, IncHI1/2, IncN).  
494  
495 PacBio sequencing data were assembled using the HGAP pipeline(38), and polished  
496 with the corresponding Illumina datasets using Pilon (version 1.18, default  
497 parameters)(39). Chromosomal sequences and plasmid sequences were then manually  
498 curated where possible to create complete, closed, circular structures by using  
499 BLASTn to identify overlaps at the end of assembled contigs. Those with overlapping

500 ends larger than 1000bp with sequence identity >99% were considered  
501 circularised/complete, and trimmed appropriately for resolution. Complete sequences  
502 were annotated using PROKKA (version 1.11)(40); annotations were used to  
503 determine genes known to encode toxin-antitoxin systems, heavy metal resistance,  
504 and anti-restriction mechanisms.

505

#### 506 *Tn4401* typing

507 *Tn4401* typing was performed using TETyper(10), using the *Tn4401*, SNP and  
508 structural profile reference files included with the package  
509 (<https://github.com/aesheppard/TETyper>; Aug 2019), and a flanking length of 5bp,  
510 representative of the known target site signature sequence indicative of *Tn4401*  
511 transposition(41).

512

#### 513 *Plasmid database for bla<sub>KPC</sub> plasmid typing*

514 A reference *bla<sub>KPC</sub>* plasmid sequence database composed of *bla<sub>KPC</sub>*-harbouring  
515 contigs/plasmids from long-read sequencing of isolates in this study and all complete  
516 *bla<sub>KPC</sub>* plasmids from (42-44) (August 2018) was used for *bla<sub>KPC</sub>* plasmid typing  
517 within this study. To construct this database, all 279/6018 evaluable plasmid  
518 sequences carrying *bla<sub>KPC</sub>* were first compared using *dnadiff*(45) to obtain the  
519 pairwise similarity between any two plasmid sequences  $p_i$  and  $p_j$ . The similarity was  
520 defined as a function of their lengths  $l_i$ ,  $l_j$ , and the aligned bases  $l_{ij}$ ,  $l_{ji}$  as reported by:

$$(p_i, p_j) = \frac{1}{2} \left( \frac{l_{ij}}{l_i} + \frac{l_{ji}}{l_j} \right) \times \min \left( \frac{l_i}{l_j}, \frac{l_j}{l_i} \right)$$

521

522 The score was designed to penalise differences in length of the compared sequences,  
523 i.e. to make sequences of different lengths proportionately more different. The

524 resulting similarity matrix was used to perform clustering of plasmid sequences using  
525 the affinity propagation clustering technique, suitable for graph clustering problems  
526 with sparse similarity matrix and uneven cluster size and cluster number(46), and  
527 resulted in 34 clusters of 1-43 plasmids per cluster (Table S3). The largest cluster was  
528 the set of pKpQIL-like plasmids comprising 43 related sequences. Representative  
529 sequences of each *bla*<sub>KPC</sub> plasmid cluster in this network were chosen randomly, to  
530 generate a set (*KPC-pDB*) of plasmids ranging from 7,995bp (NC\_022345.1; plasmid  
531 pAP-2) to 447,095bp (NZ\_CP029436.1; plasmid pKPC\_CAV2013) in the final  
532 database used for *bla*<sub>KPC</sub> plasmid typing in this study.

533

534 Subsequently, *bla*<sub>KPC</sub> plasmid typing for each study isolate sequence was performed  
535 as follows: (1) assembled sequences for each isolate were BLASTed (BLASTn)  
536 against *KPC-pDB*; (2) any >1kb contig with >90% nucleotide identity and >80% total  
537 coverage match to sequences in *KPC-pDB* was retained; (3) for any sequence  $p_i$  in  
538 *KPC-pDB*, a score  $s_i$  was calculated by dividing the total matched bases of all contigs  
539 matched to  $p_i$  by  $p_i$ 's length; and (4) an isolate was assumed to plausibly carry  $p_i$  if  $s_i$   
540  $\geq 0.80$ . An isolate could have several *bla*<sub>KPC</sub> plasmid matches; we restricted to the top  
541 match for each isolate in our analyses.

542

#### 543 *Statistical analysis and data visualisation*

544 Statistical analysis (Kruskal-Wallis testing) was carried out in Stata 14.2. Plots for  
545 figures 1, 2, 5 and S1 were generated using ggplot2 in R (version 1.1.463). Figure 4  
546 was generated using the GenomeDiagram package(47) in Biopython(48).

547

548 **Acknowledgements and funding:** We are grateful to and acknowledge the sharing of  
549 isolates by microbiology and clinical teams from contributing UK hospitals, and from  
550 Martin Cormican and the contributing laboratories in Dublin, Republic of Ireland. We  
551 are also grateful to the microbiology laboratory staff and infection control teams at  
552 Manchester University NHS Foundation Trust (formerly CMFT and UHSM); the staff  
553 of the Manchester Medical Microbiology Partnership; and the research laboratory,  
554 informatics and project management teams working as part of the Modernising  
555 Medical Microbiology consortium (Oxford).

556

557 Contemporaneous investigation by CMFT, UHSM and PHE was undertaken as part  
558 of routine activity. The retrospective investigation was funded by the National  
559 Institute for Health Research Health Protection Research Unit (NIHR HPRU) in  
560 Healthcare Associated Infections and Antimicrobial Resistance at Oxford University  
561 in partnership with Public Health England (PHE) [grant HPRU-2012-10041] and  
562 supported by the NIHR Biomedical Research Centre, Oxford. The views expressed in  
563 this publication are those of the authors and not necessarily those of the NHS, the  
564 National Institute for Health Research, the Department of Health or Public Health  
565 England. NS is funded by a PHE/University of Oxford Academic Clinical  
566 Lectureship. TEAP, DWC and ASW are NIHR Senior Investigators.

567

568 The Transmission of Carbapenemase-producing Enterobacteriaceae (TRACE) study  
569 investigators are listed alphabetically, and include several of the authors also listed by  
570 name in the main author list: Zoie Aiken, Oluwafemi Akinremi, Aiysha Ali, Julie  
571 Cawthorne, Paul Cleary, Derrick W. Crook, Valerie Decraene, Andrew Dodgson,  
572 Michel Doumith, Matthew J. Ellington, Ryan George, John Grimshaw, Malcolm



573 Guiver, Robert Hill, Katie L. Hopkins, Rachel Jones, Cheryl Lenney, Amy J.  
574 Mathers, Ashley McEwan, Ginny Moore, Mark Neilson, Sarah Neilson, Tim E.A.  
575 Peto, Hang T.T. Phan, Mark Regan, Anna C. Seale, Nicole Stoesser, Jay Turner-  
576 Gardner, Vicky Watts, A. Sarah Walker, Jimmy Walker, David Wyllie, William  
577 Welfare and Neil Woodford.  
578  
579 None of the authors has any conflicts of interest to declare.

## 580 **References**

- 581 1. David S, Reuter S, Harris SR, Glasner C, Feltwell T, Argimon S, Abudahab  
582 K, Goater R, Giani T, Errico G, Aspbury M, Sjunnebo S, Eu SWG, Group ES,  
583 Feil EJ, Rossolini GM, Aanensen DM, Grundmann H. 2019. Epidemic of  
584 carbapenem-resistant *Klebsiella pneumoniae* in Europe is driven by  
585 nosocomial spread. *Nat Microbiol* doi:10.1038/s41564-019-0492-8.
- 586 2. Mathers AJ, Stoesser N, Sheppard AE, Pankhurst L, Giess A, Yeh AJ, Didelot  
587 X, Turner SD, Sebra R, Kasarskis A, Peto T, Crook D, Sifri CD. 2015.  
588 *Klebsiella pneumoniae* Carbapenemase (KPC)-Producing *K-pneumoniae* at a  
589 Single Institution: Insights into Endemicity from Whole-Genome Sequencing.  
590 *Antimicrobial Agents and Chemotherapy* 59:1661-1668.
- 591 3. Cerqueira GC, Earl AM, Ernst CM, Grad YH, Dekker JP, Feldgarden M,  
592 Chapman SB, Reis-Cunha JL, Shea TP, Young S, Zeng Q, Delaney ML, Kim  
593 D, Peterson EM, O'Brien TF, Ferraro MJ, Hooper DC, Huang SS, Kirby JE,  
594 Onderdonk AB, Birren BW, Hung DT, Cosimi LA, Wortman JR, Murphy CI,  
595 Hanage WP. 2017. Multi-institute analysis of carbapenem resistance reveals  
596 remarkable diversity, unexplained mechanisms, and limited clonal outbreaks.  
597 *Proc Natl Acad Sci U S A* 114:1135-1140.

- 598 4. Ruiz-Garbajosa P, Curiao T, Tato M, Gijon D, Pintado V, Valverde A,  
599 Baquero F, Morosini MI, Coque TM, Canton R. 2013. Multiclonal dispersal of  
600 KPC genes following the emergence of non-ST258 KPC-producing *Klebsiella*  
601 *pneumoniae* clones in Madrid, Spain. *J Antimicrob Chemother* 68:2487-92.
- 602 5. Martin J, Phan H, Findlay J, Stoesser N, Pankhurst L, Navickaite I, De Maio  
603 N, Eyre D, Toogood G, Orsi N, Kirby A, Young N, Turton J, Hill R, Hopkins  
604 K, Woodford N, Peto T, Walker A, Crook D, Wilcox M. 2017. Covert  
605 dissemination of carbapenemase-producing *Klebsiella pneumoniae* (KPC) in a  
606 successfully controlled outbreak: long and short-read whole-genome  
607 sequencing demonstrate multiple genetic modes of transmission. *Journal of*  
608 *Antimicrobial Chemotherapy*.
- 609 6. Sheppard AE, Stoesser N, Wilson DJ, Sebra R, Kasarskis A, Anson LW,  
610 Giess A, Pankhurst LJ, Vaughan A, Grim CJ, Cox HL, Yeh AJ, Modernising  
611 Medical Microbiology Informatics G, Sifri CD, Walker AS, Peto TE, Crook  
612 DW, Mathers AJ. 2016. Nested Russian Doll-Like Genetic Mobility Drives  
613 Rapid Dissemination of the Carbapenem Resistance Gene blaKPC.  
614 *Antimicrob Agents Chemother* 60:3767-78.
- 615 7. Quainoo S, Coolen JPM, van Hijum S, Huynen MA, Melchers WJG, van  
616 Schaik W, Wertheim HFL. 2017. Whole-Genome Sequencing of Bacterial  
617 Pathogens: the Future of Nosocomial Outbreak Analysis. *Clin Microbiol Rev*  
618 30:1015-1063.
- 619 8. Walker TM, Monk P, Smith EG, Peto TE. 2013. Contact investigations for  
620 outbreaks of *Mycobacterium tuberculosis*: advances through whole genome  
621 sequencing. *Clin Microbiol Infect* 19:796-802.

- 622 9. Munoz-Price LS, Poirel L, Bonomo RA, Schwaber MJ, Daikos GL, Cormican  
623 M, Cornaglia G, Garau J, Gniadkowski M, Hayden MK, Kumarasamy K,  
624 Livermore DM, Maya JJ, Nordmann P, Patel JB, Paterson DL, Pitout J,  
625 Villegas MV, Wang H, Woodford N, Quinn JP. 2013. Clinical epidemiology  
626 of the global expansion of *Klebsiella pneumoniae* carbapenemases. *Lancet*  
627 *Infect Dis* 13:785-96.
- 628 10. Sheppard AE, Stoesser N, German-Mesner I, Vegesana K, Sarah Walker A,  
629 Crook DW, Mathers AJ. 2018. TETyper: a bioinformatic pipeline for  
630 classifying variation and genetic contexts of transposable elements from short-  
631 read whole-genome sequencing data. *Microb Genom* 4.
- 632 11. Palepou MFW, N.; Hope, R.; Colman, M.; Glover, J.; Kaufmann, M.; Lafong,  
633 C.; Reynolds, R.; Livermore, D. M. 2005. Novel class A carbapenemase,  
634 KPC-4, in an *Enterobacter* isolate from Scotland, abstr abstr. 1134\_01\_20.  
635 Prog. Abstr. 15th Eur. Cong. Clin. Microbiol. Infect. Dis., Copenhagen,  
636 Denmark.
- 637 12. Public Health England. 2011. Carbapenemase-producing Enterobacteriaceae:  
638 laboratory confirmed cases, 2003 to 2013.  
639 [https://www.gov.uk/government/publications/carbapenemase-](https://www.gov.uk/government/publications/carbapenemase-producing-enterobacteriaceae-laboratory-confirmed-cases/carbapenemase-producing-enterobacteriaceae-laboratory-confirmed-cases-2003-to-2013)  
640 [producing-enterobacteriaceae-laboratory-confirmed-](https://www.gov.uk/government/publications/carbapenemase-producing-enterobacteriaceae-laboratory-confirmed-cases/carbapenemase-producing-enterobacteriaceae-laboratory-confirmed-cases-2003-to-2013)  
641 [cases/carbapenemase-producing-enterobacteriaceae-laboratory-](https://www.gov.uk/government/publications/carbapenemase-producing-enterobacteriaceae-laboratory-confirmed-cases/carbapenemase-producing-enterobacteriaceae-laboratory-confirmed-cases-2003-to-2013)  
642 [confirmed-cases-2003-to-2013](https://www.gov.uk/government/publications/carbapenemase-producing-enterobacteriaceae-laboratory-confirmed-cases/carbapenemase-producing-enterobacteriaceae-laboratory-confirmed-cases-2003-to-2013). Accessed 02/09/2016.
- 643 13. Donker T, Henderson KL, Hopkins KL, Dodgson AR, Thomas S, Crook DW,  
644 Peto TEA, Johnson AP, Woodford N, Walker AS, Robotham JV. 2017. The  
645 relative importance of large problems far away versus small problems closer

- 646 to home: insights into limiting the spread of antimicrobial resistance in  
647 England. *BMC Med* 15:86.
- 648 14. Findlay J, Hopkins KL, Doumith M, Meunier D, Wiuff C, Hill R, Pike R, Loy  
649 R, Mustafa N, Livermore DM, Woodford N. 2016. KPC enzymes in the UK:  
650 an analysis of the first 160 cases outside the North-West region. *J Antimicrob*  
651 *Chemother* 71:1199-206.
- 652 15. Doumith M, Findlay J, Hirani H, Hopkins KL, Livermore DM, Dodgson A,  
653 Woodford N. 2017. Major role of pKpQIL-like plasmids in the early  
654 dissemination of KPC-type carbapenemases in the UK. *J Antimicrob*  
655 *Chemother* 72:2241-2248.
- 656 16. Siguier P, Gourbeyre E, Chandler M. 2014. Bacterial insertion sequences:  
657 their genomic impact and diversity. *FEMS Microbiol Rev* 38:865-91.
- 658 17. Cuzon G, Naas T, Nordmann P. 2011. Functional characterization of Tn4401,  
659 a Tn3-based transposon involved in blaKPC gene mobilization. *Antimicrob*  
660 *Agents Chemother* 55:5370-3.
- 661 18. Cuzon G, Naas T, Truong H, Villegas MV, Wisell KT, Carmeli Y, Gales AC,  
662 Venezia SN, Quinn JP, Nordmann P. 2010. Worldwide diversity of *Klebsiella*  
663 *pneumoniae* that produce beta-lactamase blaKPC-2 gene. *Emerg Infect Dis*  
664 16:1349-56.
- 665 19. He S, Hickman AB, Varani AM, Siguier P, Chandler M, Dekker JP, Dyda F.  
666 2015. Insertion Sequence IS<sub>26</sub> Reorganizes Plasmids in Clinically  
667 Isolated Multidrug-Resistant Bacteria by Replicative Transposition. *mBio*  
668 6:e00762-15.

- 669 20. Qi Y, Wei Z, Ji S, Du X, Shen P, Yu Y. 2011. ST11, the dominant clone of  
670 KPC-producing *Klebsiella pneumoniae* in China. *J Antimicrob Chemother*  
671 66:307-12.
- 672 21. Harmer CJ, Hall RM. 2016. IS26-Mediated Formation of Transposons  
673 Carrying Antibiotic Resistance Genes. *mSphere* 1.
- 674 22. Liang W, Xie Y, Xiong W, Tang Y, Li G, Jiang X, Lu Y. 2017. Anti-  
675 Restriction Protein, KlcAHS, Promotes Dissemination of Carbapenem  
676 Resistance. *Front Cell Infect Microbiol* 7:150.
- 677 23. Arredondo-Alonso S, Willems RJ, van Schaik W, Schurch AC. 2017. On the  
678 (im)possibility of reconstructing plasmids from whole-genome short-read  
679 sequencing data. *Microb Genom* 3:e000128.
- 680 24. Public Health England. 2018. English Surveillance Programme for  
681 Antimicrobial Utilisation and Resistance (ESPAUR), Report 2018.
- 682 25. Decraene V, Phan HTT, George R, Wyllie DH, Akinremi O, Aiken Z, Cleary  
683 P, Dodgson A, Pankhurst L, Crook DW, Lenney C, Walker AS, Woodford N,  
684 Sebra R, Fath-Ordoubadi F, Mathers AJ, Seale AC, Guiver M, McEwan A,  
685 Watts V, Welfare W, Stoesser N, Cawthorne J, Group TI. 2018. A Large,  
686 Refractory Nosocomial Outbreak of *Klebsiella pneumoniae* Carbapenemase-  
687 Producing *Escherichia coli* Demonstrates Carbapenemase Gene Outbreaks  
688 Involving Sink Sites Require Novel Approaches to Infection Control.  
689 *Antimicrob Agents Chemother* 62.
- 690 26. Sherry NL, Lane CR, Kwong JC, Schultz M, Sait M, Stevens K, Ballard S,  
691 Goncalves da Silva A, Seemann T, Gorrie CL, Stinear TP, Williamson DA,  
692 Brett J, van Diemen A, Easton M, Howden BP. 2019. Genomics for Molecular

- 693           Epidemiology and Detecting Transmission of Carbapenemase-Producing  
694           Enterobacterales in Victoria, Australia, 2012 to 2016. *J Clin Microbiol* 57.
- 695   27.   Weingarten RA, Johnson RC, Conlan S, Ramsburg AM, Dekker JP, Lau AF,  
696           Khil P, Odom RT, Deming C, Park M, Thomas PJ, Program NCS, Henderson  
697           DK, Palmore TN, Segre JA, Frank KM. 2018. Genomic Analysis of Hospital  
698           Plumbing Reveals Diverse Reservoir of Bacterial Plasmids Conferring  
699           Carbapenem Resistance. *MBio* 9.
- 700   28.   Cheruvanky A, Stoesser N, Sheppard AE, Crook DW, Hoffman PS, Weddle  
701           E, Carroll J, Sifri CD, Chai W, Barry K, Ramakrishnan G, Mathers AJ. 2017.  
702           Enhanced *Klebsiella pneumoniae* Carbapenemase Expression from a Novel  
703           Tn4401 Deletion. *Antimicrob Agents Chemother* 61.
- 704   29.   Bi D, Zheng J, Li JJ, Sheng ZK, Zhu X, Ou HY, Li Q, Wei Q. 2018. In Silico  
705           Typing and Comparative Genomic Analysis of IncFIIK Plasmids and Insights  
706           into the Evolution of Replicons, Plasmid Backbones, and Resistance  
707           Determinant Profiles. *Antimicrob Agents Chemother* 62.
- 708   30.   De Maio N, Shaw LP, Hubbard A, George S, Sanderson ND, Swann J, Wick  
709           R, AbuOun M, Stubberfield E, Hoosdally SJ, Crook DW, Peto TEA, Sheppard  
710           AE, Bailey MJ, Read DS, Anjum MF, Walker AS, Stoesser N, On Behalf Of  
711           The Rehab C. 2019. Comparison of long-read sequencing technologies in the  
712           hybrid assembly of complex bacterial genomes. *Microb Genom*  
713           doi:10.1099/mgen.0.000294.
- 714   31.   Wick RR, Judd LM, Gorrie CL, Holt KE. 2017. Completing bacterial genome  
715           assemblies with multiplex MinION sequencing. *Microb Genom* 3:e000132.
- 716   32.   Lamble S, Batty E, Attar M, Buck D, Bowden R, Lunter G, Crook D, El-  
717           Fahmawi B, Piazza P. 2013. Improved workflows for high throughput library

- 718 preparation using the transposome-based nextera system. *BMC Biotechnology*  
719 13:104.
- 720 33. Wood DE, Salzberg SL. 2014. Kraken: ultrafast metagenomic sequence  
721 classification using exact alignments. *Genome Biol* 15:R46.
- 722 34. Bankevich A, Nurk S, Antipov D, Gurevich AA, Dvorkin M, Kulikov AS,  
723 Lesin VM, Nikolenko SI, Pham S, Prjibelski AD, Pyshkin AV, Sirotkin AV,  
724 Vyahhi N, Tesler G, Alekseyev MA, Pevzner PA. 2012. SPAdes: a new  
725 genome assembly algorithm and its applications to single-cell sequencing. *J*  
726 *Comput Biol* 19:455-77.
- 727 35. Stoesser N, Batty EM, Eyre DW, Morgan M, Wyllie DH, Del Ojo Elias C,  
728 Johnson JR, Walker AS, Peto TE, Crook DW. 2013. Predicting antimicrobial  
729 susceptibilities for *Escherichia coli* and *Klebsiella pneumoniae* isolates using  
730 whole genomic sequence data. *J Antimicrob Chemother* 68:2234-44.
- 731 36. Carattoli A, Zankari E, Garcia-Fernandez A, Voldby Larsen M, Lund O, Villa  
732 L, Moller Aarestrup F, Hasman H. 2014. In silico detection and typing of  
733 plasmids using PlasmidFinder and plasmid multilocus sequence typing.  
734 *Antimicrob Agents Chemother* 58:3895-903.
- 735 37. Siguier P, Perochon J, Lestrade L, Mahillon J, Chandler M. 2006. ISfinder: the  
736 reference centre for bacterial insertion sequences. *Nucleic Acids Res* 34:D32-  
737 6.
- 738 38. Chin CS, Alexander DH, Marks P, Klammer AA, Drake J, Heiner C, Clum A,  
739 Copeland A, Huddleston J, Eichler EE, Turner SW, Korlach J. 2013.  
740 Nonhybrid, finished microbial genome assemblies from long-read SMRT  
741 sequencing data. *Nat Methods* 10:563-9.

- 742 39. Walker BJ, Abeel T, Shea T, Priest M, Abouelliel A, Sakthikumar S, Cuomo  
743 CA, Zeng Q, Wortman J, Young SK, Earl AM. 2014. Pilon: an integrated tool  
744 for comprehensive microbial variant detection and genome assembly  
745 improvement. *PLoS One* 9:e112963.
- 746 40. Seemann T. 2014. Prokka: rapid prokaryotic genome annotation.  
747 *Bioinformatics* 30:2068-9.
- 748 41. Naas T, Cuzon G, Villegas MV, Lartigue MF, Quinn JP, Nordmann P. 2008.  
749 Genetic structures at the origin of acquisition of the beta-lactamase bla KPC  
750 gene. *Antimicrob Agents Chemother* 52:1257-63.
- 751 42. Villa L, Feudi C, Fortini D, Brisse S, Passet V, Bonura C, Endimiani A,  
752 Mammina C, Ocampo AM, Jimenez JN, Doumith M, Woodford N, Hopkins  
753 K, Carattoli A. 2017. Diversity, virulence, and antimicrobial resistance of the  
754 KPC-producing *Klebsiella pneumoniae* ST307 clone. *Microbial Genomics* 3.
- 755 43. Orlek A, Phan H, Sheppard AE, Doumith M, Ellington M, Peto T, Crook D,  
756 Walker AS, Woodford N, Anjum MF, Stoesser N. 2017. A curated dataset of  
757 complete Enterobacteriaceae plasmids compiled from the NCBI nucleotide  
758 database. *Data in Brief* 12:423-426.
- 759 44. Stoesser N, Sheppard AE, Peirano G, Anson LW, Pankhurst L, Sebra R, Phan  
760 HTT, Kasarskis A, Mathers AJ, Peto TEA, Bradford P, Motyl MR, Walker  
761 AS, Crook DW, Pitout JD. 2017. Genomic epidemiology of global *Klebsiella*  
762 *pneumoniae* carbapenemase (KPC)-producing *Escherichia coli*. *Sci Rep*  
763 7:5917.
- 764 45. Kurtz S, Phillippy A, Delcher AL, Smoot M, Shumway M, Antonescu C,  
765 Salzberg SL. 2004. Versatile and open software for comparing large genomes.  
766 *Genome Biol* 5:R12.



- 767 46. Frey BJ, Dueck D. 2007. Clustering by passing messages between data points.  
768 Science 315:972-6.
- 769 47. Pritchard L, White JA, Birch PR, Toth IK. 2006. GenomeDiagram: a python  
770 package for the visualization of large-scale genomic data. Bioinformatics  
771 22:616-7.
- 772 48. Cock PJ, Antao T, Chang JT, Chapman BA, Cox CJ, Dalke A, Friedberg I,  
773 Hamelryck T, Kauff F, Wilczynski B, de Hoon MJ. 2009. Biopython: freely  
774 available Python tools for computational molecular biology and  
775 bioinformatics. Bioinformatics 25:1422-3.  
776

777 **Figure legends**

778 **Figure 1.** Estimated *bla*<sub>KPC</sub> copy number distributions within major species (Fig.1A),  
779 and the top nineteen commonest species/ST combinations (Fig.1B) observed within  
780 the study (other ST/species combinations assigned as “Other” or “Other species/ST”  
781 respectively). Dots represent estimated copy number for single isolates; boxplots  
782 represent median estimated *bla*<sub>KPC</sub> copy number  $\pm 1.58 \cdot \text{IQR} / \sqrt{n}$ . Boxplots are  
783 ordered by most common species and species/ST categories, left-to-right, except for  
784 the “Other”, “Other species/ST”, assigned to the right of the plots. For species  
785 assignments, “Kpne” = *Klebsiella pneumoniae*, “Ecol” = *Escherichia coli*, and “Eclo”  
786 = *Enterobacter cloacae*.

787

788 **Figure 2.** Incidence plots for 604 isolates included in the analysis. Dots are coloured  
789 by location of isolate collection, as defined in Methods. (A) Incidence plot of  
790 Tn4401/target site sequence (TSS; categories including  $\geq 10$  isolates); Tn4401a-1 is  
791 *bla*<sub>KPC-2</sub>/Tn4401a, Tn4401a-2 is *bla*<sub>KPC-3</sub>/Tn4401a; Tn4401a-unknown comprises a set  
792 of Tn4401a (n=18) with mutational variation including C684T, G962A  
793 C3042Y|G4739R, C4121T, G5583A and C7187T. (B) Incidence plot of plasmid  
794 replicon combinations (categories including  $\geq 10$  isolates). (C) Incidence plot of  
795 species/ST (top 20 common categories as in Fig.1).

796

797 **Figure 3.** Schematic of *bla*<sub>KPC</sub> plasmid types and sizes identified from long-  
798 read/short-read hybrid sequencing approach by species/ST and year of collection (NB  
799 only 21 contigs clearly designated as plasmid are represented). Closed circles denote  
800 circularised contigs (i.e. complete plasmids); circle colours denote replicon types  
801 assigned to each plasmid sequence (i.e. multiple colours represent multi-replicon

802 plasmids). Plasmids from isolates from the wider UK collection are denoted with a  
803 “\*”.

804

805 **Figure 4.** Alignments of plasmid sequences harbouring an IncFII(K)\_1\_CP000648-  
806 like replicon, includes *bla*<sub>KPC</sub>-negative and *bla*<sub>KPC</sub>-positive sequences. All sequences  
807 were re-orientated to start at IncFII for the purposes of alignment visualization (this  
808 also includes incomplete sequences, for which the exact structure and order may  
809 therefore be a proxy only). Loci of interest have been coloured and annotated as  
810 shown. Shading between sequences denotes regions of homology, with light pink  
811 shading denoting areas  $\geq 90\%$  nucleotide identity, dark pink areas  $\geq 50\%$  nucleotide  
812 identity, and light blue areas  $\geq 90\%$  nucleotide identity in reverse orientation. The  
813 order of sequences is adjusted to highlight genetic overlap between sequences, but not  
814 to imply any specific direct exchange events.

815

816 **Figure 5.** Short-read *bla*<sub>KPC</sub> plasmid typing results (top match) for isolates by species  
817 and date. Dots are coloured by location of isolate collection, as defined in Methods.

818

### 819 **Supplementary Tables and Figures**

820 **Figure S1.** Estimated *bla*<sub>KPC</sub> copy number distributions for species/ST combinations.

821 Dots represent estimated copy number for single isolates; boxplots represent median  
822 estimated *bla*<sub>KPC</sub> copy number  $\pm 1.58 \cdot \text{IQR} / \sqrt{n}$ . For species assignments, “Eclo”

823 = *Enterobacter cloacae*, “Ecol” = *Escherichia coli*, “Ente” = *Enterobacter* spp.,

824 “Kluy” = *Kluvera* spp., “Koxy” = *Klebsiella oxytoca*, “Kpne” = *Klebsiella*

825 *pneumoniae*, “Raou” = *Raoultella ornithinolytica*, “Serr” = *Serratia marcescens*.

826 **Table S1.** Details of isolates assembled using short-read (Illumina) and long-read  
827 (PacBio) datasets.

828

829 **Table S2.** Plasmid typing matches for isolates with short-read (Illumina) and long-  
830 read (PacBio) assemblies and reconstructed plasmid structures.

831

832 **Table S3.** Assignment of *bla*<sub>KPC</sub> plasmids in study reference database to clusters for  
833 plasmid typing.

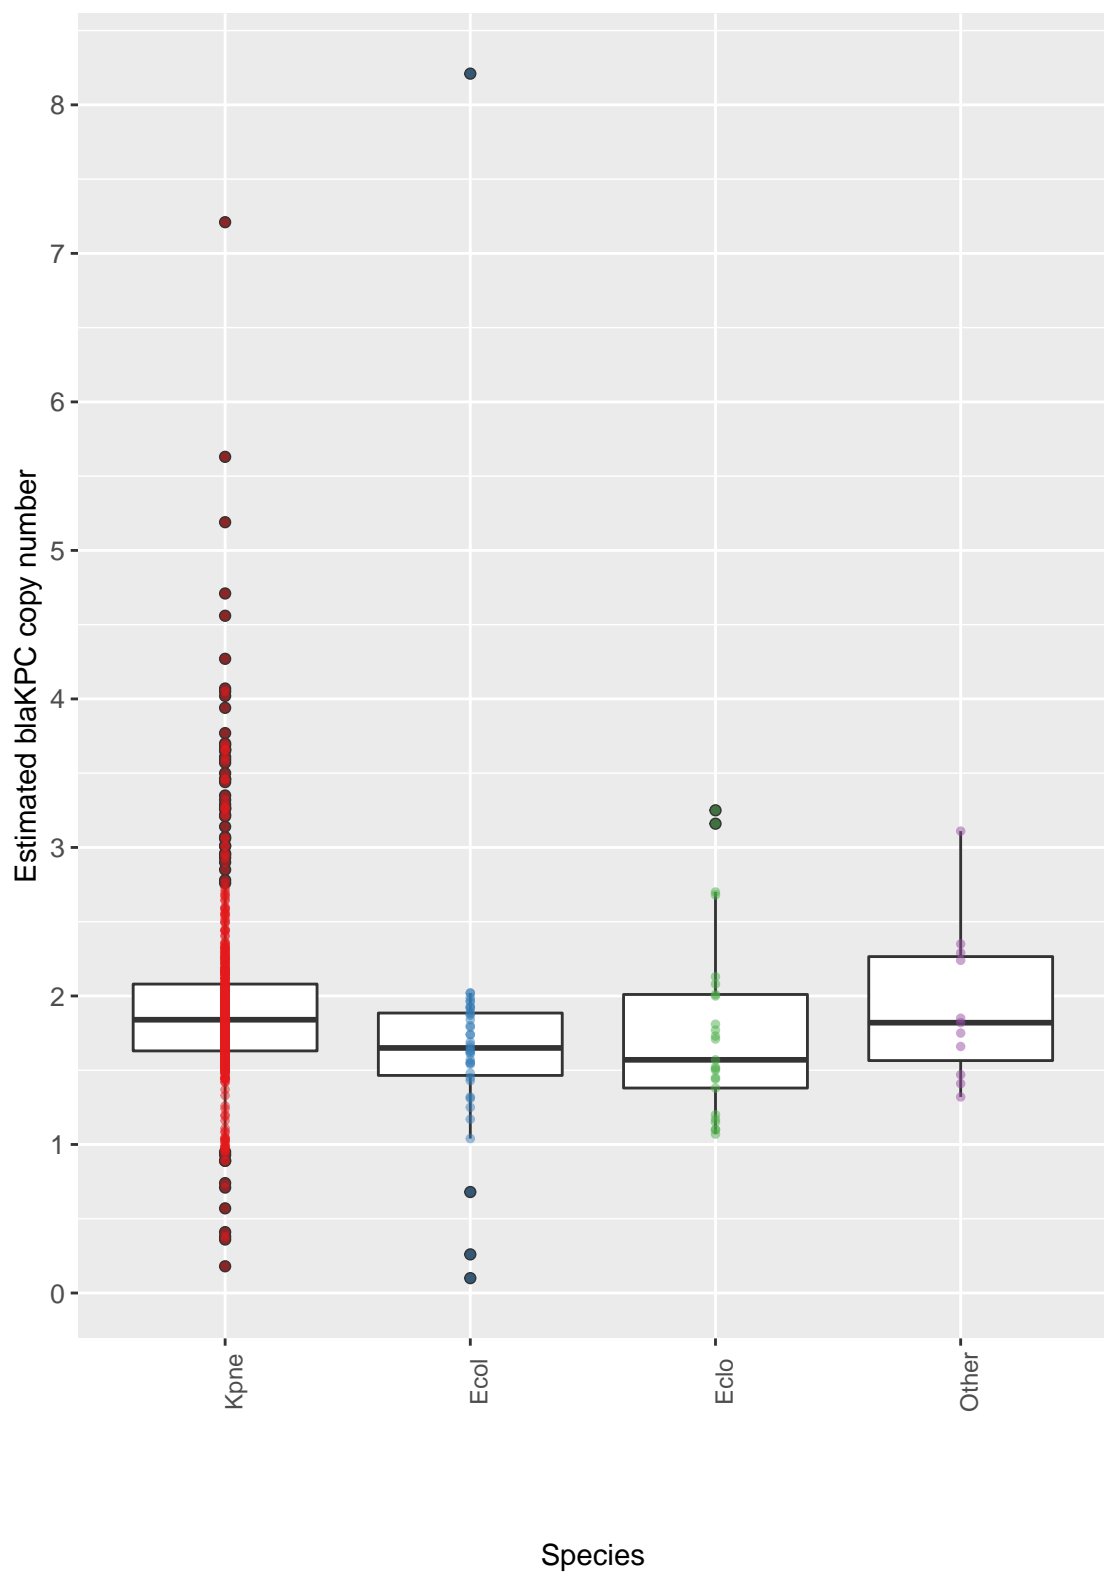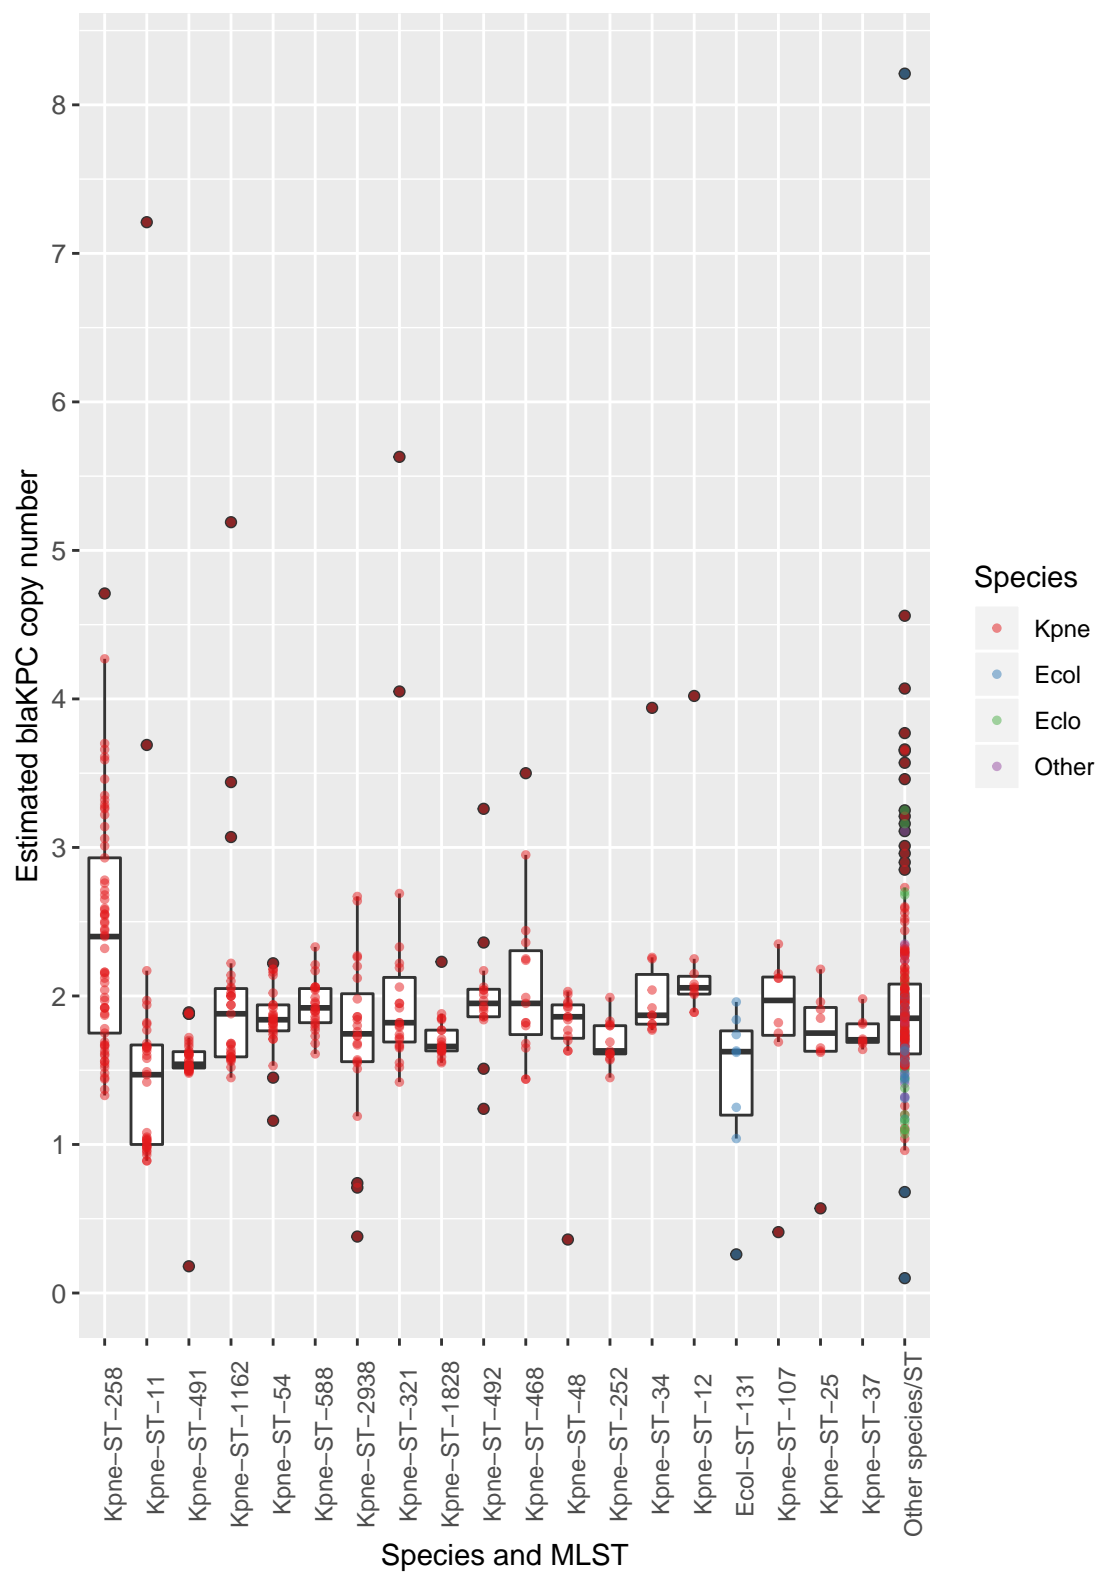

Top Tn4401 types and target site sequences within isolates

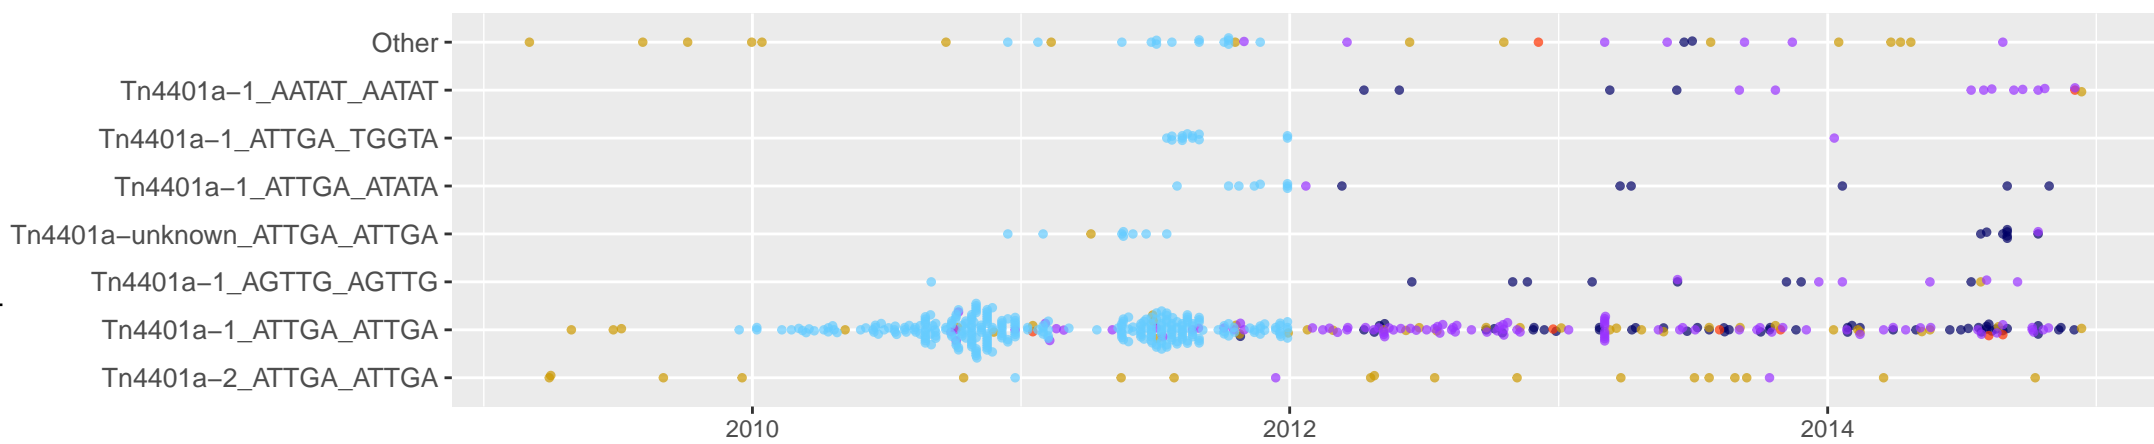

Top plasmid populations within isolates defined by Inc types

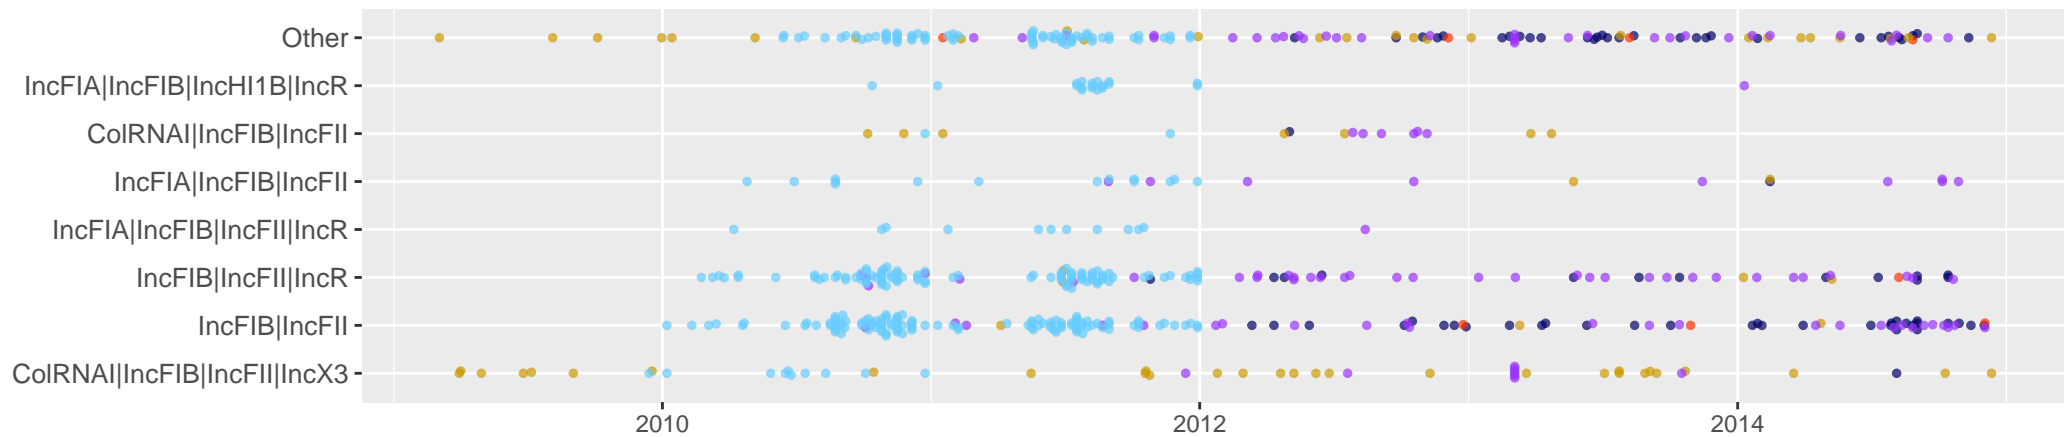

Top species and multilocus sequence types

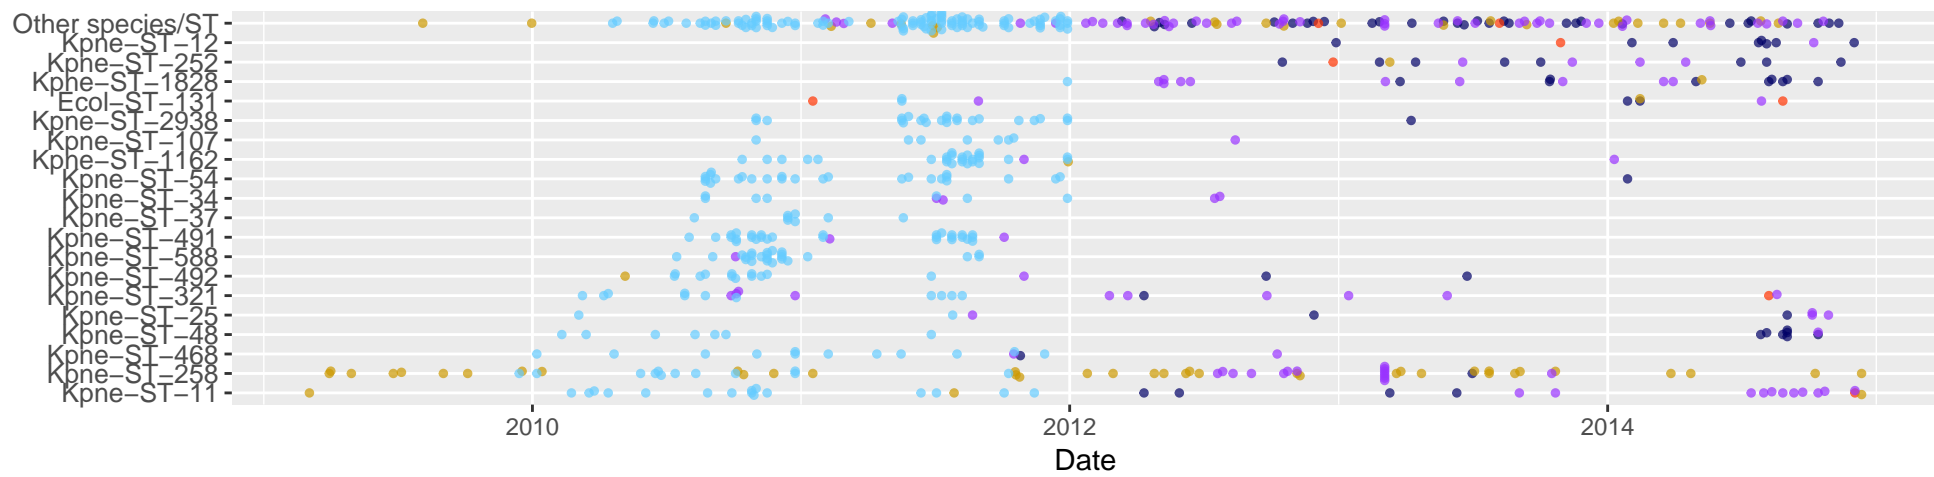

• 2009–2011 cmft/uhs • 2012–2014 cmft/uhs • 2009–2014 nw region • 2009–2014 other uk hospital • 2009–2014 outpatient

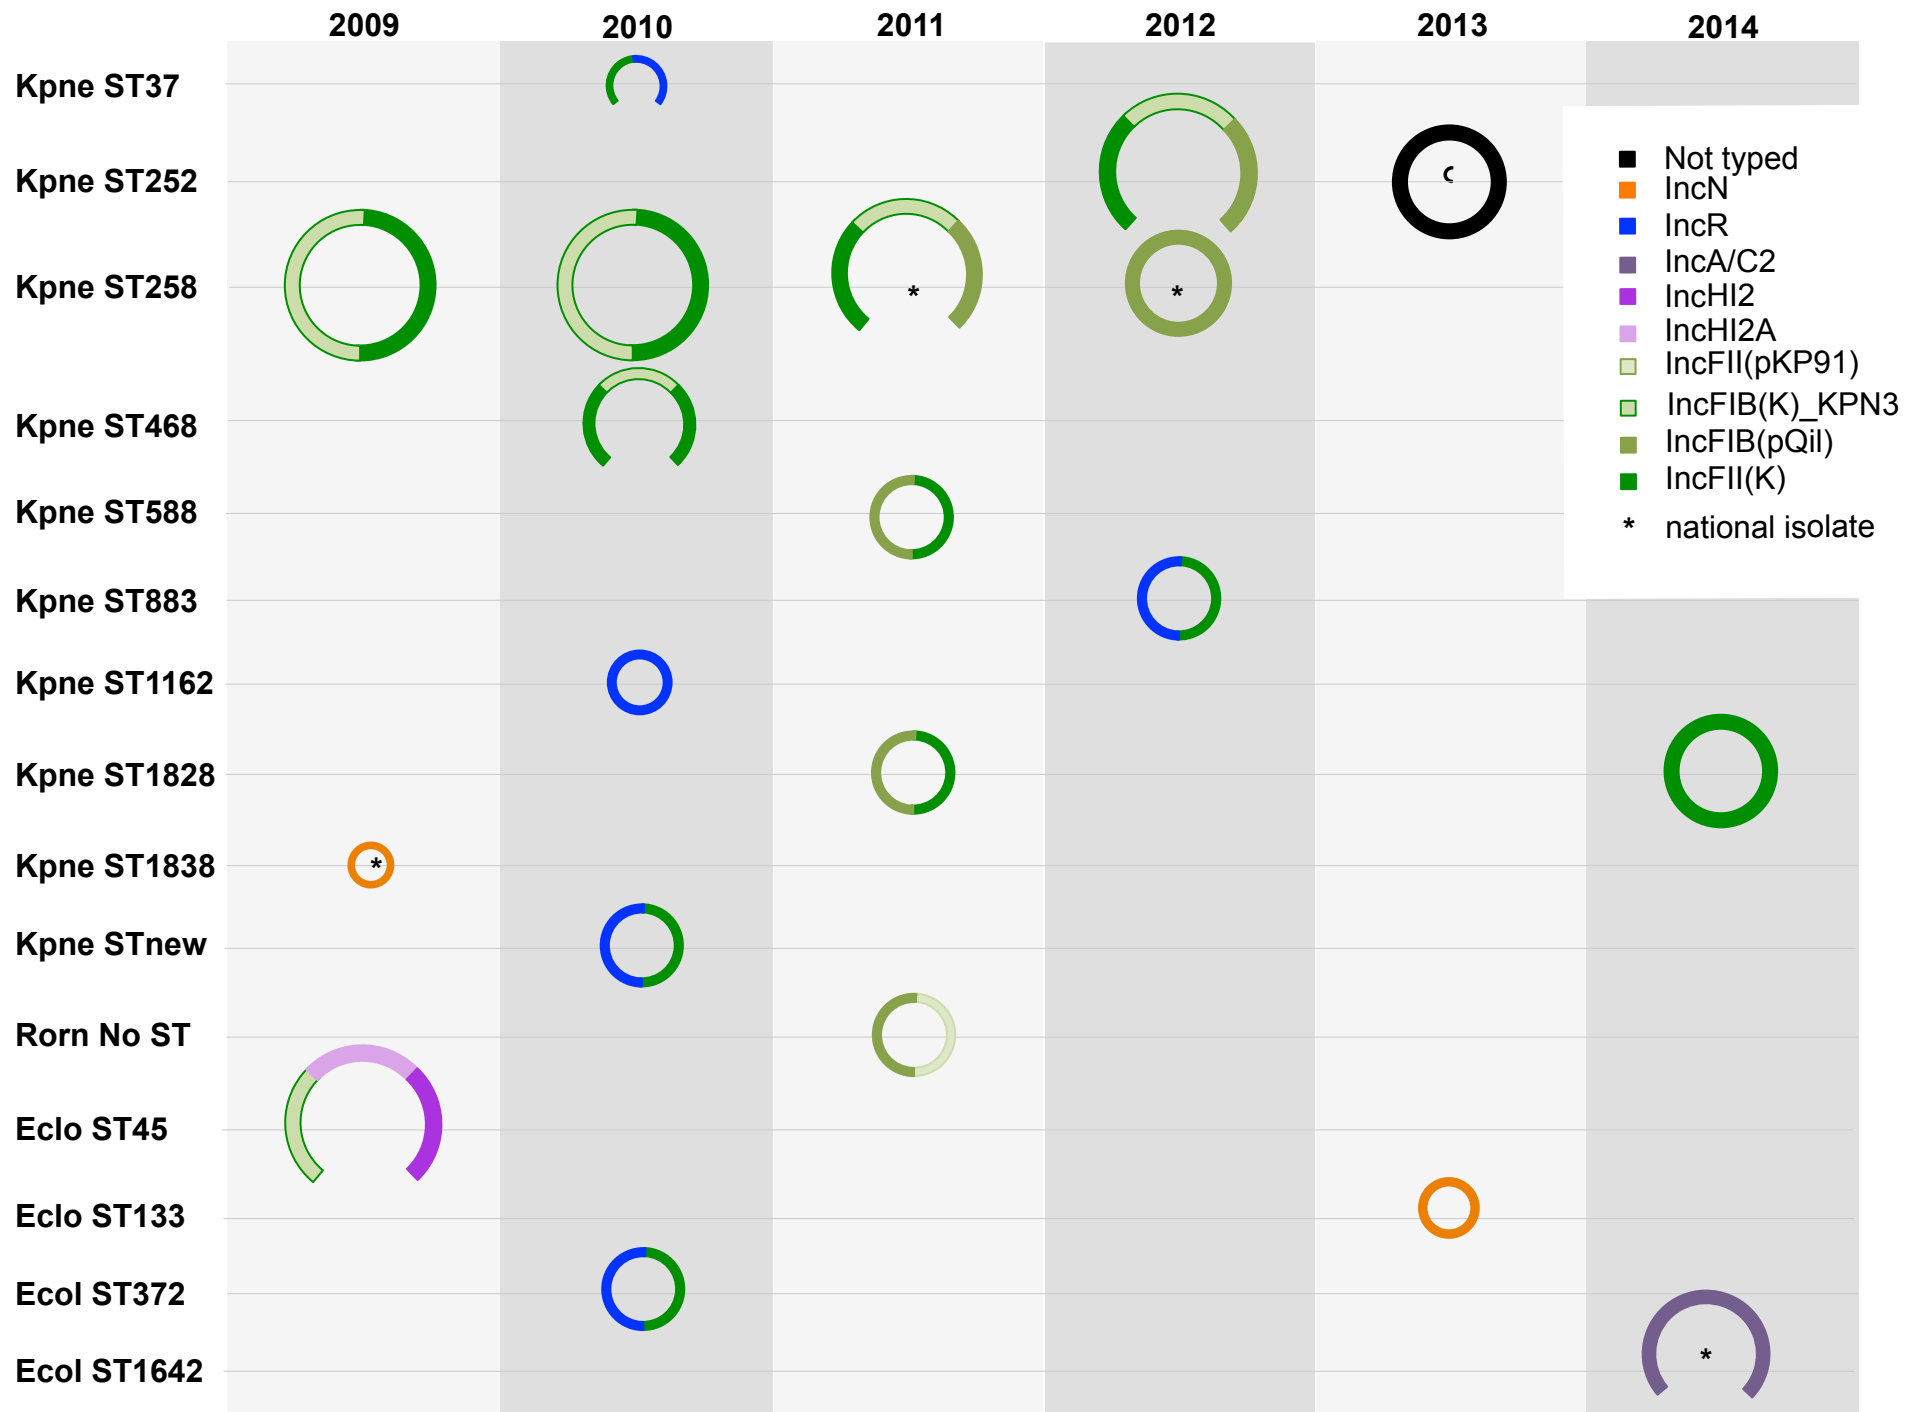

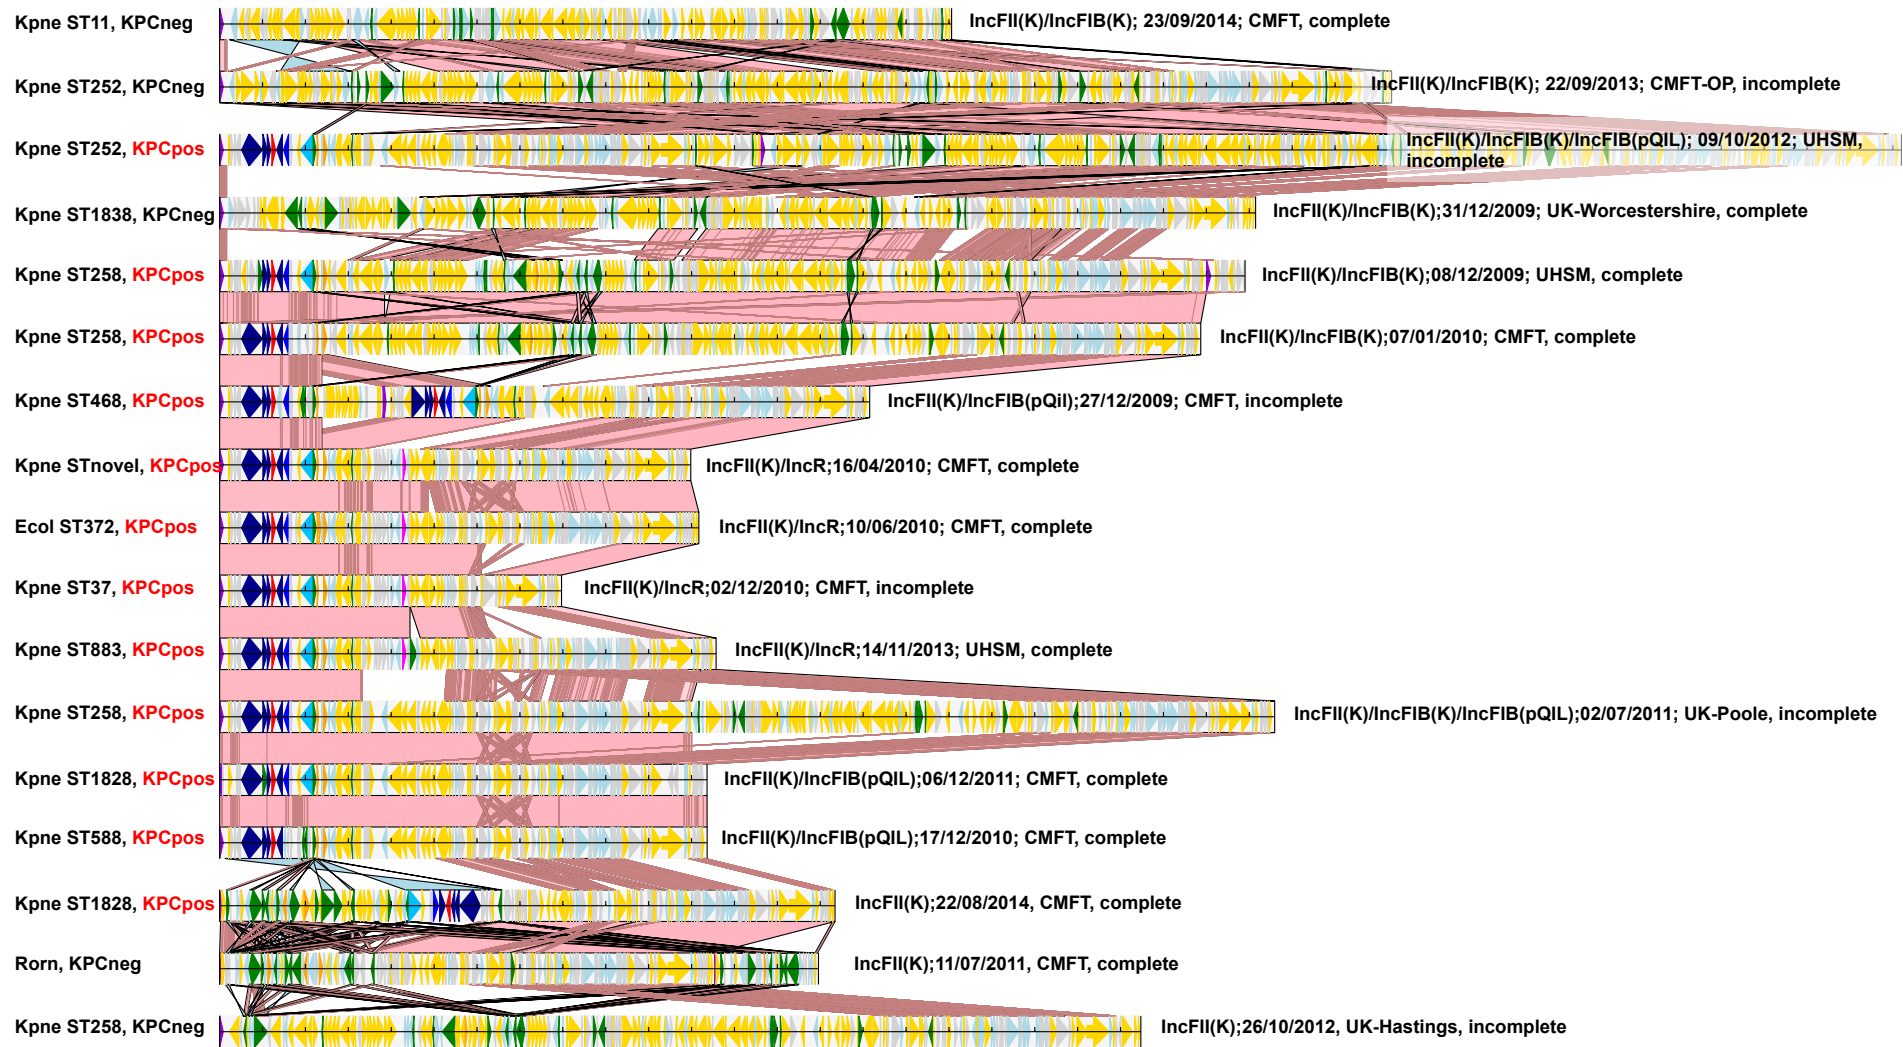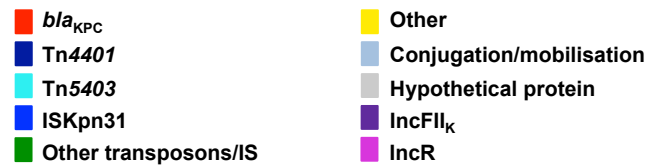



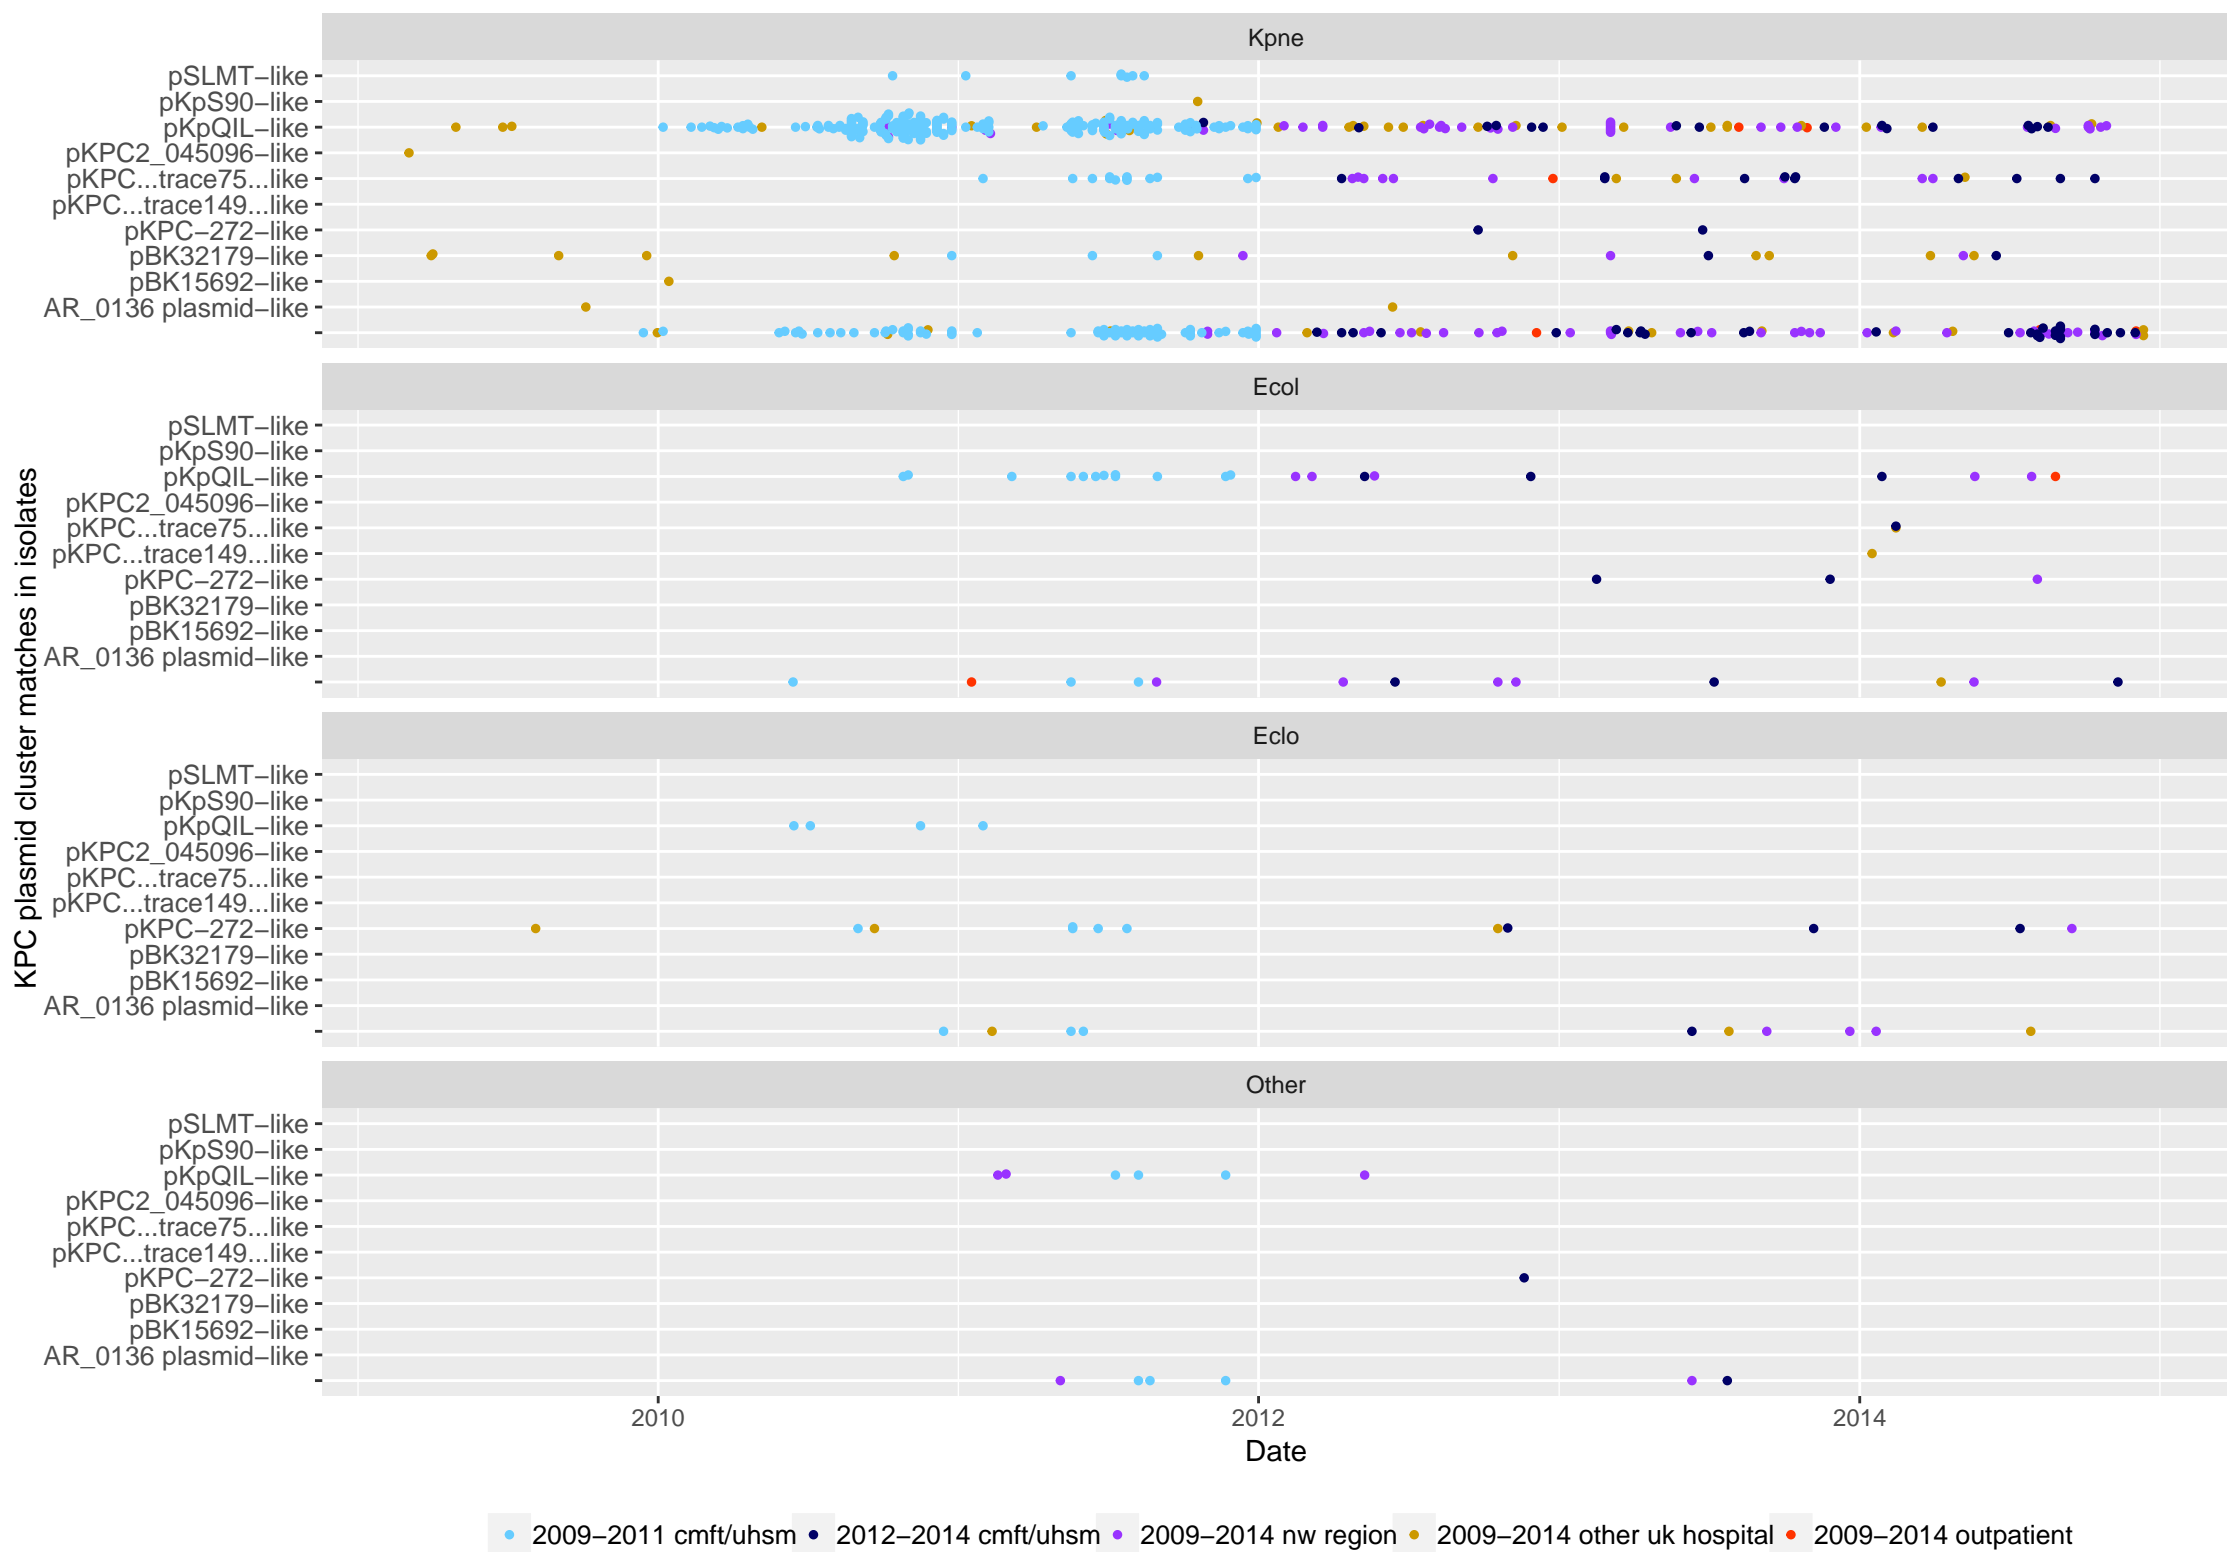

Source: http://biorxiv.org/content/10.1101/779538v1.full.pdf
